1 Retinoid-X Receptor Agonists Increase Thyroid Hormone Competence in Lower Jaw Remodeling of Pre-  
2 Metamorphic *Xenopus laevis* tadpoles

3

4

5 Brenda J. Mengeling\*, Lara F. Vetter, and J. David Furlow

6

7 Department of Neurobiology, Physiology, and Behavior, College of Biological Sciences, University of  
8 California, Davis, 1 Shields Ave., Davis, CA 95616

9

10 \*corresponding author: [mengeling@ucdavis.edu](mailto:mengeling@ucdavis.edu)

11

12 DISCLOSURE STATEMENT: the authors have nothing to disclose

13

14 Running Title: RXR agonists increase thyroid hormone competence

15

16

17

18 Abstract

19

20 Thyroid hormone (TH) signaling plays critical roles during vertebrate development, including regulation  
21 of skeletal and cartilage growth. TH acts through its receptors (TRs), nuclear hormone receptors (NRs)  
22 that heterodimerize with Retinoid-X receptors (RXRs), to regulate gene expression. A defining difference  
23 between NR signaling during development compared to in adult tissues, is competence, the ability of the  
24 organism to respond to an endocrine signal. Amphibian metamorphosis, especially in *Xenopus laevis*, the  
25 African clawed frog, is a well-established in vivo model for studying the mechanisms of TH action during  
26 development. Previously, we've used one-week post-fertilization *X. laevis* tadpoles, which are only  
27 partially competent to TH, to show that in the tail, which is naturally refractive to exogenous T3 at this  
28 stage, RXR agonists increase TH competence, and that RXR antagonism inhibits the TH response. Here,  
29 we focused on the jaw that undergoes dramatic TH-mediated remodeling during metamorphosis in order  
30 to support new feeding and breathing styles. We used a battery of approaches in one-week-old tadpoles,  
31 including quantitative morphology, differential gene expression and whole mount cell proliferation  
32 assays, to show that both pharmacologic (bexarotene) and environmental (tributyltin) RXR agonists  
33 potentiated TH-induced responses but were inactive in the absence of TH; and the RXR antagonist UVI  
34 3003 inhibited TH action. At this young age, the lower jaw has not developed to the point that T3-induced  
35 changes produce an adult-like jaw morphology, and we found that increasing TH competence with RXR  
36 agonists did not give us a more natural-metamorphic phenotype, even though Bex and TBT significantly  
37 potentiated cellular proliferation and the TH induction of *runx2*, a transcription factor critical for  
38 developing cartilage and bone. Prominent targets of RXR-mediated TH potentiation were members of the  
39 matrix metalloprotease family, suggesting that RXR potentiation may emphasize pathways responsible  
40 for rapid changes during development.

41

42

43 Introduction

44

45 An organism's acquired ability to respond both qualitatively and quantitatively to a physiological  
46 signal, defined as competence, is distinguished between endocrine signaling during development, which  
47 tends to lead to irreversible, organizational effects, from that of healthy adult tissues, which controls the  
48 functioning of tissues and organs to maintain homeostasis. Thyroid hormone (TH) action regulates many  
49 aspects of vertebrate development including cartilage growth and skeletogenesis (1–4). Over  
50 developmental time, the vertebrate organism traverses from low to high TH competence (5). Vertebrate  
51 development depends upon appropriate timing and concentrations of TH for good biological outcomes.  
52 During human development, adverse outcomes arise from both insufficient and excessive TH (1,6–10).  
53 However, analysis of the effects of TH on mammalian development are confounded by maternal effects  
54 due to the nature of intrauterine growth. Amphibian metamorphosis, the process through which larval  
55 tadpoles develop into adult frogs, overcomes these obstacles; it provides an accessible and dramatic  
56 model for direct investigation of the role TH plays during vertebrate development (11–14).  
57 Metamorphosis is initiated and maintained through the action of TH (15–18). The African clawed frog,  
58 *Xenopus laevis*, provides an accessible and effective laboratory model for assessing the role of TH  
59 throughout development, and its metamorphosis has been shown to model the essential perinatal surge in  
60 TH signaling in humans (11,14).

61 In all vertebrates, TH acts through the thyroid hormone receptors (TRs), which are DNA-binding,  
62 ligand-regulated transcription factors of the nuclear receptor (NR) superfamily (19,20). THs are identical  
63 across all taxa, and the TRs are highly conserved between *X. laevis* and humans (12,13). Two isoforms of  
64 TR are expressed from two different genes, TR $\alpha$  and TR $\beta$ . In *X. laevis* tadpoles, TR $\alpha$  is expressed before  
65 synthesis of THs commences (21), whereas TR $\beta$  expression is induced after the nascent thyroid gland  
66 begins to synthesize THs through TH binding to TR $\alpha$ ; it is a direct target gene of TRs (22,23). 3,3',5-  
67 triiodo-L-thyronine (T3) is the TH with the highest affinity for the TRs (24–26). TRs bind DNA and can  
68 regulate gene transcription in both the absence and presence of TH. In the most-studied model of TH

69 action, apo-TRs recruit co-repressor proteins, which close the chromatin environment to the general  
70 transcription machinery, causing transcriptional repression. In contrast, T3-bound TRs recruit co-activator  
71 proteins, which open the chromatin environment to the general transcription machinery, causing  
72 transcriptional activation (19,20). TRs heterodimerize with another NR, the retinoid-X receptors (RXRs)  
73 (27). RXRs bind several natural ligands, including 9-cis retinoic acid, and they can dimerize with many  
74 different NRs in addition to TRs (28). The TR-RXR heterodimer shows higher affinity for DNA,  
75 especially in the presence of T3, than the TR-TR homodimer (29).

76         Due to the importance of TH signaling for proper development, man-made chemicals that disrupt  
77 TR action have the potential to produce adverse outcomes (30). Our initial investigations into disruption  
78 of TR function used an integrated TRE-driven Luc reporter in a rat pituitary cell line that endogenously  
79 expresses both TR $\alpha$  and TR $\beta$  (31,32). In that cell culture system, vitamin A (VA) metabolites were the  
80 primary hits for disrupting the TRE-Luc reporter (33). VA metabolites can activate both the retinoic acid  
81 receptors (RARs) and the RXRs, depending upon the metabolite (34). RARs, like TRs and RXRs, are  
82 members of the NR superfamily. The documented but not mechanistically understood ability of VA  
83 metabolites to convert into each other make using them to determine RAR vs RXR function difficult. A  
84 pharmaceutical RAR ligand did not affect the TRE-Luc reporter (32), but a pharmaceutical RXR agonist  
85 did (33). Since RARs should not bind a TRE, and RXRs heterodimerize with TRs on TREs, these results  
86 would appear unsurprising were it not for the fact that, in most adult tissues and cells, RXR ligands are  
87 unable to affect the action of the TR-RXR heterodimer (35,36). Pituitary cells, like the reporter cell line,  
88 are an exception, wherein RXR ligands do affect the ability of TR to control the hypothalamus-pituitary-  
89 thyroid (HPT) axis (37); the biological reasons for this are not understood. In fact, the pharmaceutical  
90 RXR agonist used in this study, bexarotene (brand name Targretin, Bex), produces severe hypothyroidism  
91 in patients given the drug, which limits its usability as a chemotherapeutic (38–40). However, given the  
92 inability of RXR ligands to affect TR function in peripheral tissues, such as the liver—a major site of TR  
93 function—the TR-RXR heterodimer is generally considered to be an example of a “non-permissive” RXR  
94 heterodimer, meaning that only the ligand for the TR, TH, can induce activation. This is also thought to

95 “make sense” because TH is an endocrine hormone that tightly regulates several important biological  
96 functions like heart rate, and tight, endocrine-type regulation would be complicated if a second hormone  
97 or environmental ligand (dietary, etc) were also able to affect TR-RXR action (35).

98       Tributyltin (TBT) is a pervasive environmental pollutant that was the first described endocrine  
99 disruptor when it was discovered that exposure to TBT caused marine gastropods to develop imposex  
100 phenotypes, where female gastropods develop male secondary sex characteristics (41,42). TBT was  
101 widely used as an antifoulant in marine paints. Mechanistic work determined that TBT functioned  
102 through the mollusk RXR, and that treating marine gastropods with either 9-cis retinoic acid or TBT  
103 produced the same imposex phenotype (43–45). Biophysical investigations showed that TBT covalently  
104 binds to a cysteine residue at the entrance to the RXR ligand-binding pocket, creating an activated  
105 conformation in the RXR (46). In the rat pituitary reporter cell line, TBT behaved like Bex, strongly  
106 suggesting that it was functioning as an RXR agonist (33,47). These results left open the question as to  
107 whether RXR agonists in a developing organism would behave like RXR agonists in most adult tissues  
108 (i.e. RXR agonists have no effect on TR action) or like in our pituitary reporter cell line (i.e. RXR  
109 agonists could modulate TR function).

110       Previously, we developed a suite of quantitative assays to assess function and possible disruption  
111 of TH action in 1-week post-fertilization (1wk-PF) tadpoles (NF 48) (48). 1wk-PF tadpoles express TR $\alpha$ ,  
112 but they do not yet have an active thyroid gland; therefore, they are TH negative and are considered pre-  
113 competent (21). Addition of T3 to their rearing water activates many metamorphic pathways, but the  
114 addition of T3 does not make their TH competence complete. For example, tail resorption, the last step of  
115 metamorphosis, is minimal even under supraphysiological doses of T3, because at least in part, the tail  
116 expresses high levels of the T3-deactivating enzyme, deiodinase 3 (49). We found that the addition of Bex  
117 or TBT to the rearing water of 1wk-PF tadpoles in the presence of T3 significantly potentiated the action  
118 of T3 in larval tissues undergoing resorption, including the tail (47,50). In effect TBT/Bex increased T3  
119 competence in the tail to near metamorphic levels. At the transcriptomic level in the tadpole tail we found  
120 that TBT acted identically to Bex, solidifying that the mechanism of TBT action on TH function was at

121 the level of RXR agonism (50). We wondered if the potentiating effects of RXR agonists affected  
122 metamorphic phenotypes beyond resorption.

123 Amphibian metamorphosis affects almost every tissue system and cell fate decision. TH induces  
124 the jaw to remodel to facilitate the transition from an herbivorous tadpole to a carnivorous adult frog.  
125 During natural metamorphosis, visible jaw morphological changes start at NF 59, which is approximately  
126 45 days post-fertilization (PF) under ideal rearing conditions (51,52). Thomson describes three phases of  
127 Meckels cartilage development in the lower jaw (LJ): 1) a lag phase (NF 57-59) with low levels of cell  
128 proliferation, 2) a division phase (NF 60-62) of rapid cell division, and 3) a synthesis phase (NF 62-66)  
129 wherein the matrix content of the cartilage increases significantly (53,54). Rose showed that tadpoles  
130 prior to NF 57 (~41 days PF) respond to the TH but the beak-like morphological changes that result are  
131 not seen in a natural metamorphosis (51). Between NF 48 and NF 57 significant, non-TH-induced growth  
132 occurs to the cartilages of the lower jaw, and this growth appears to be essential for producing appropriate  
133 morphology upon TH administration. Bearing this in mind, we investigated whether RXR ligands were  
134 able to potentiate the T3-induced changes that are possible at NF 48, where we have an extant suite of  
135 quantitative assays to monitor potential disruption of T3 action (48). We found that both Bex and TBT  
136 potentiated T3-induced proliferation, the activation of *runx2*, a transcription factor necessary for  
137 maturation of cartilage and bone ossification, and the matrix metalloproteases *mmp11* and *mmp13l*. On  
138 the other hand, the RXR antagonist UVI 3003 (UVI) (55) prevented T3-induced morphological changes  
139 while not inhibiting proliferation, and it only selectively inhibited gene transcription. In addition, Bex and  
140 TBT still potentiated T3 action in the LJ in tadpoles at NF 54, which are considered prometamorphic and  
141 fully competent to respond to THs.

142

143

144

145 Materials and Methods:

146

147 **Reagents:**

148 3,3',5-triiodo-L-thyronine (T3, T6397-100MG) and tributyltin chloride (TBT, T50202-5G) were  
149 purchased from MilleporeSigma (Burlington, MA) and Bexarotene (Bex, 5819/10 and UVI 3003 (UVI,  
150 3303/10) were purchased from Tocris Biosciences (Bio-Techne, Minneapolis, MN). All treatment ligands  
151 were dissolved or diluted in dimethyl sulfoxide (DMSO, Thermo Fisher Scientific, Waltham, MA). oLH  
152 (ovine luteinizing hormone) was purchased through the National Hormone and Peptide Program (Los  
153 Angeles, CA), pregnant mare serum gonadotropin was purchased from Thermo Fisher Scientific, and  
154 tricaine methanesulfonate was purchased from Western Medical Supply (Arcadia, CA).

155

156 **Animal husbandry:**

157 The laboratory has an approved University of California Davis Institutional Animal Care and Use  
158 protocol that covers the husbandry and mating of adult *Xenopus laevis* frogs and ligand exposure of larval  
159 tadpoles. Wild-type *X. laevis* frogs were mated and embryos cultured as described (Mengeling 2017).

160

161 **Tadpole precocious metamorphosis morphology assay:**

162 NF 48 (1-week post-fertilization) tadpoles were treated, fixed for photography, and dorsal head  
163 photos taken using a Leica DFC3000 G camera on a Leica MZLFIII microscope as described (Mengeling  
164 2016 and 2017). Treatment concentrations, unless otherwise indicated were 10 nM T3, 30 nM Bex, 1 nM  
165 TBT, and 600 nM UVI, based upon previous results. The angle of the lower jaw was measured using the  
166 FIJI (56) distribution of ImageJ (57). GraphPad Prism 9 (GraphPad Software, La Jolla, CA) was used to  
167 generate box and whisker plots, where boxes represent the 25<sup>th</sup> to 75<sup>th</sup> percentiles with the bar at the  
168 median, and whiskers are maximum and minimum values. For statistical analyses, each animal counted as  
169 an individual, and 2 clutches (ten tadpoles/clutch) were assayed independently to control for clutch-to-  
170 clutch variability. NF 54 tadpoles were treated as NF 48 animals except that the volume/tadpole of rearing

171 water was increased to 50 ml, and treatments were stopped at three days rather than five, due to the  
172 extreme gill resorption in the T3 + Bex animals. Three independent clutches of NF 54 tadpoles were used  
173 with 4-5 tadpoles per clutch.

174

#### 175 **Immunohistochemistry of lower jaws for proliferation:**

176 The lower jaws from tadpoles fixed as for morphology were removed as follows: a straight cut  
177 was made just posterior to the olfactory epithelium and anterior to the eyes. the upper and lower jaw were  
178 separated, and two diagonal cuts were made on the outer rim of the jaw to separate the cartilage from the  
179 excess tissue. LJs were treated as described for immunohistochemical analysis of phospho-Histone H3  
180 reactivity (EMD Milipore, 06-570, 1/300 dilution) (48,58). Anti-phospho-Histone H3 (Ser10) was from  
181 EMD Milipore (06-570, 1/300 dilution), and goat anti-rabbit IgG (H+L) conjugated with Alexa Fluor  
182 488 was from Molecular Probes (A11008, 1/400 dilution). Positive cells were counted from blinded  
183 images using the Cell Counter tool of Fiji.

184

#### 185 **Gene Expression:**

186 Tadpoles were treated with ligands for 48 hours as for morphology and as described (47,50),  
187 using a 2-way ANOVA design: vehicle (DMSO), T3, RXR ligand, and T3 + RXR ligand. Lower jaws  
188 were isolated from unfixed tadpoles as for immunohistochemistry. Pools of 15 LJs from a single clutch  
189 were used for total RNA extraction. LJ tissue was disrupted and homogenized by bead beating with two  
190 0.125-inch stainless steel beads for 1 minute in a Mini-Beadbeater-16 (Biospec Products, Bartlesville,  
191 OK). Total RNA was extracted using the RNeasy Plus Mini Kit per the manufacturer's instructions  
192 (Qiagen, Germantown, MD). Total RNA was quantified using a NanoDrop (Thermo Fisher Scientific,  
193 Waltham, MA). One microgram of total RNA was used to synthesize cDNA with the High-Capacity  
194 Reverse Transcription Kit (Thermo Fisher Scientific), and 0.5 µl of cDNA from a 20-µl reaction was used  
195 in a 10-µl reaction using PowerUp SYBR Green Master Mix (Thermo Fisher Scientific) in a Roche  
196 LightCycler 480. The *X. laevis rpl8* gene was used as a normalizer. Statistics were performed using 2-way



197 ANOVA analysis with a Sidak's multiple comparison test (MCT) in GraphPad Prism 9. Sequences for the  
198 primers used for quantitative PCR are given S1 Table.

199

200 **Transgenic tadpole luciferase reporter assay:**

201       NF 54 tadpoles, sorted at 1 wk-PF for GFP+ expression in the eye lens, were staged by assessing  
202 morphology of the hind limb, according to the normal scale by Nieuwkoop and Faber (59), and then  
203 treated through their rearing water for two days as previously described (50). Treatment concentrations  
204 were 10 nM T3 and 2 nM TBT. No mortality arose from the treatments over the treatment period. After  
205 treatment, tadpoles were anesthetized in 0.1% MS-222 (Western Medical) buffered with 0.1% sodium  
206 bicarbonate. The LJs were excised and minced on ice prior to freezing and then processed and assayed as  
207 described. Each animal was treated as an individual for statistical purposes (n = 9 per treatment) from two  
208 independent clutches (4 animals in one clutch and 5 in the other). Two-way ANOVA using clutch and  
209 treatment as covariates with Tukeys MCT to compare treatments was used from GraphPad Prism 9.

210

211

212 Results:

213

214 **RXR agonists potentiate T3-induced morphological changes to the lower jaw, and an RXR**  
215 **antagonist abrogates T3 effects**

216 Using our precocious metamorphosis assay system, we treated *X. laevis* 1wk-PF tadpoles (NF 48)  
217 for five days by exposure through their rearing water with vehicle or 10 nM T3 in the presence or absence  
218 of RXR ligands. This treatment period did not result in animal mortality under any of the treatment  
219 conditions. Previously, we found that 30 nM Bex and 1 nM TBT produced maximal, non-toxic responses,  
220 and so we used them here (47,50). The dorsal head photos in Figure 1 show representative animals from  
221 each treatment regimen. Vehicle treatment resulted in normal tadpole morphology (Figure 1a), and  
222 treatment with the RXR ligands in the absence of T3 (Figure 1b-1d) did not result in morphological  
223 changes. Treatment with 10 nM T3 (Figure 1e) resulted in visible gill resorption and decreased the angle  
224 of Meckels cartilage. Co-treatment with either RXR agonist, Bex or TBT, potentiated the T3-inductions  
225 of gill resorption and the angle of Meckels cartilage (Figure 1f-1g). However, co-treatment with the RXR  
226 antagonist UVI 3003, abrogated the effect of T3 on both morphologic phenotypes.

227

228 **Figure 1:** RXR agonists potentiate T3-induced changes to lower jaw morphology, while an RXR  
229 antagonist abrogates T3 action. a-h: Representative dorsal head photos of tadpoles treated for five days  
230 starting at 1wk-PF (30 nM Bex, 1 nM TBT, 600 nM UVI). i-k: Quantification of changes to the jaw  
231 angle. Boxes represent 25<sup>th</sup>-75<sup>th</sup> percentiles with the line at the median (n = 10-15 from 2-3 clutches), and  
232 whiskers represent the min and max values. Statistics show results from Sidak's multiple comparison test  
233 in conjunction with 2-way ANOVA (\*\*\*\*, p < 0.0001). l: Effect of Bex and TBT on T3-induced jaw  
234 angle changes as a function of time. Data points represent means from 20 animals from two different  
235 clutches; error bars delineate the 95% confidence intervals, indicating statistical significance. m:  
236 Treatment with 30 nM Bex augments jaw angle narrowing as a function of T3 dose. Statistics are the  
237 same as in the time course, although the clutches were different.

238

239 In order to quantify the effects of T3 and the RXR ligands on Meckels cartilage, we measured the  
240 angle of the LJ (Figure 1i-k) from independent clutches of tadpoles, using ten animals per clutch. The  
241 inset photos (Figure 1a, 1e, 1f) show the change in angle that was measured. Protrusion of the Meckels  
242 cartilage caused a decrease in the LJ angle. Figure 1i shows that in the presence of T3, 30 nM Bex  
243 significantly potentiated the decrease in the LJ angle (compare red boxes). 2-way ANOVA analysis  
244 indicated significance for the interaction between T3 and Bex ( $p < 0.0001$ ). As with our study on the  
245 effects of RXR agonists on T3-induced tail resorption, 1 nM TBT behaved almost identically to 30 nM  
246 Bex; the interaction between T3 and TBT was significant ( $p < 0.0001$ ). In contrast, co-treatment of T3  
247 and the RXR antagonist UVI prevented T3 action, and the LJ angle was not significantly changed from  
248 vehicle-treated tadpoles (Figure 1k); however, due to the strong abrogation of the T3-induction by UVI,  
249 the interaction between T3 and T3+UVI was still significant by 2-way ANOVA ( $p < 0.0001$ ). Figure 1l  
250 shows the LJ angle measurement as a function of treatment time. Again, co-treatment of either Bex or  
251 TBT with T3 caused an identical response that showed an acceleration of the Meckels cartilage  
252 protrusion. Tadpoles treated for four days with T3 plus RXR agonist had the same decrease in LJ angle as  
253 tadpoles treated for five days with T3-alone. Over a T3-dose curve, the T3-induced decrease in LJ angle  
254 was significant starting at 5 nM T3 (error bars represent the 95% confidence interval), and all doses of T3  
255 in the presence of Bex showed a significantly reduced LJ angle compared to T3-alone, such that 5 nM T3  
256 plus Bex/TBT produced the same LJ angle as 15 nM T3 (Figure 1m), which is the dose that produces the  
257 maximal change in LJ angle.

258

259 **RXR agonists potentiated T3-induced cellular proliferation in Meckels cartilage, but the RXR**  
260 **antagonist had no effect**

261 In young tadpoles, exogenous T3 administration triggers proliferation in several tissues, including  
262 the LJ (58). We excised LJs after four days of treatment for whole mount immunohistochemistry (IHC) of  
263 the mitotic marker phospho-Ser10 Histone 3 (pH3) to assess the effects of T3 and RXR ligands on

264 cellular proliferation in Meckels cartilage. 1wk-PF tadpoles were treated for four days instead of five to  
265 facilitate LJ removal; T3-induced changes to the gills and brain make removing the LJ more difficult after  
266 five days of treatment. Proliferative cells were counted from blinded images over the area of Meckels  
267 cartilage (Figure 2a). Figure 2b-f show representative photos of different ligand treatment combinations  
268 from which proliferative cells were counted. For quantification, each combination of T3 and RXR ligand  
269 were assayed with two independent clutches, and for each clutch, RXR agonist potentiation was  
270 significant. Figure 2g-i shows the two clutches combined for each group. Vehicle-treated LJs had few  
271 proliferative cells (Figure 2g-i). In contrast, treatment with 10 nM T3 increased the number of mitotic  
272 cells at least 15-fold for each treatment group. Co-treatment of either 30 nM Bex (Figure 2g) or 1 nM  
273 TBT (Figure 2h) RXR agonists with the T3 resulted in a significant increase in the number of  
274 proliferating cells in the Meckels cartilage. Since the RXR agonists induced a significant increase in  
275 proliferative cells, we expected that co-treatment of the RXR antagonist UVI with T3 would result in a  
276 decrease in proliferative cells. However, as Figure 2i shows, that is not the case; UVI did not inhibit  
277 cellular proliferation in Meckels cartilage. Therefore, the RXR agonists potentiated both the decrease in  
278 LJ angle and the induction of cell division; however, UVI prevented T3 action morphologically (Figure  
279 1h) but had no effect on T3-induction of proliferation (Figure 2i). Aurora kinase B (*aurkb*) is the kinase  
280 that performs the phosphorylation of Ser10 of H3. T3 induced *aurkb* mRNA expression (figure 2j-l);  
281 however, neither Bex (Figure 2j) nor TBT (Figure 2k) significantly increased that induction, suggesting  
282 that increased *aurkb* expression alone was not the mechanism through which the RXR agonists  
283 potentiated cell proliferation in Meckels cartilage. UVI inhibition of *aurkb* was not significantly different  
284 from T3-alone ( $p = 0.081$ ) (Figure 2l).

285  
286 **Figure 2:** RXR agonists potentiate T3 action on cellular proliferation in the LJ of 1wk-PF tadpoles. a:  
287 Region of Meckels cartilage used for quantitation of proliferation. b-f: Representative photos of the  
288 effects of different treatments on proliferation using phopho-Ser10-H3 reactivity. g-i: Quantification of  
289 proliferation in the presence and absence of T3 and RXR ligands. Boxes and statistics are as in Figure 1

290 (n = 20-30 jaws from 2-3 clutches). j-l: RXR ligands do not significantly affect the T3-induced expression  
291 of aurora kinase B mRNA (*aurkb*). Bars represent the mean of 3-6 independent clutches, and statistics  
292 show results from Sidak's multiple comparison test in conjunction with 2-way ANOVA (\*\*\*\*, p <  
293 0.0001; \*\*\*, p < 0.001; \*, p < 0.05).

294

### 295 **RXR agonist potentiation of gene expression is gene specific**

296 Our previous work examining the role of RXR ligands to perturb T3-mediated gene expression in  
297 the tails of 1-wk-PF tadpoles after a 48-hour induction, showed that the *bona fide* TR target gene for TR $\beta$ ,  
298 *thrb*, was modestly, but significantly, potentiated by the RXR agonists and inhibited by the antagonist  
299 when assayed at the transcriptomic level using Tag-Seq. However, over a time course assayed by RT-  
300 qPCR, the same two-day time point showed no significant potentiation and inhibition by the agonists and  
301 antagonist, respectively (50). Using RT-qPCR to assess *thrb* expression in the LJ after two days of  
302 treatment, we found significant activation by T3 (white bars in Figure 3a), but neither Bex nor TBT  
303 potentiated that induction (slashed bars in Figure 3a, Bex, TBT). UVI also did not inhibit the T3 induction  
304 (slashed bar in Figure 3a, UVI). TH-bZIP is a transcription factor that is one of the most strongly TH-  
305 induced genes during metamorphosis. It is encoded by the *thibz* gene, and it is another TR direct target  
306 gene, having at least two TREs in the promoter region (60). In the LJ, T3 strongly induced *thibz*  
307 expression (Figure 3b, white bars), but the RXR agonists did not potentiate the signal (Figure 3b, slashed  
308 bars, Bex, TBT). However, UVI did significantly reduce the T3 induction of *thibz* (Figure 3b, slashed bar,  
309 UVI). In the tail, we found the same outcome: the RXR agonists did not affect *thibz* expression, but the  
310 RXR antagonist significantly did (47,50). These results strongly suggest that the RXR agonists and  
311 antagonist are not always operating reciprocally.

312

313 **Figure 3:** RXR ligands have gene-specific effects on T3-induced differential gene expression. Left  
314 column: The effect of RXR agonist Bex on T3-induced gene expression. Middle column: The effect of  
315 environmental RXR agonist TBT on T3-induced genes. Right column: The effect of RXR antagonist UVI

316 on T3-induced genes. Striped bars indicate the presence of the RXR ligand, and white bars show  
317 induction in the absence of the RXR ligand. Statistics show results from Sidak's multiple comparison test  
318 in conjunction with 2-way ANOVA (\*\*\*\*,  $p < 0.0001$ ; \*\*\*,  $p < 0.001$ ; \*\*,  $p < 0.01$ ; \*,  $p < 0.05$ ).

319

320 During metamorphosis, matrix metalloprotease activity is essential for both tissue resorption and  
321 tissue remodeling. We and others have shown the importance of stromelysin-3 (*mmp11*) and collagenase-  
322 3 (*mmp13l*) expression (61–63). We found in the LJ that *mmp11* was strongly activated by T3 (white bars  
323 in Figure 3c). Co-treatment with 30 nM Bex increased *mmp11* expression, although this result did not  
324 reach statistical significance ( $p = 0.068$ ), using the maximal number of biological replicates ( $n = 6$ )  
325 recommended for pooled, outbred animal tissues. However, co-treatment of T3 with 1 nM TBT did result  
326 in significantly potentiation of *mmp11* expression ( $n = 3$ ,  $p = 0.0004$ ). Furthermore, UVI inhibited the T3  
327 induction of *mmp11* significantly ( $n = 4$ ,  $p = 0.001$ ). In the experiments using Bex, even though T3 on its  
328 own activated the *mmp13l* gene 20.8-fold (S.E.M. = 4.95) (white bars in Figure 3d), this activation did not  
329 reach statistical significance ( $p = 0.0589$ ), like it does in the tail. However, co-treatment with Bex  
330 increased *mmp13l* activation to significance ( $p < 0.0001$ ) compared to both vehicle and T3-only  
331 treatments (slashed bar in Figure 3d, Bex). This situation held true for co-treating T3 with TBT (slashed  
332 bar in Figure 3d, TBT): T3-alone activation of *mmp13l* was not significant ( $p = 0.65$ ), while T3 + TBT  
333 treatment was significantly potentiated ( $p < 0.0001$ ) compared to both vehicle and T3-alone (slashed bar  
334 in Figure 3d, TBT). In contrast, in the experiments using UVI, the 7.3-fold activation by T3-alone did  
335 reach statistical significance ( $p = 0.0008$ ,  $n = 4$ ), but UVI did not significantly inhibit T3 induction of the  
336 gene ( $p = 0.14$ ).

337 Runx2 is a transcription factor that is required for the transition from proliferating chondrocytes  
338 to hypertrophic chondrocytes in the maturation of cartilage for the development of a bony skeleton (64–  
339 66). In non-amniote animals like fish and amphibia, it is required earlier for rostral cartilage formation  
340 (67,68). Due to the extensive changes to jaw cartilage during metamorphosis, we investigated whether T3  
341 regulated its expression. In the LJ, T3 induced expression of *runx2* approximately 7-fold (white bars in

342 Figure 3e), and this induction was significantly potentiated through co-treatment of either Bex or TBT  
343 with the T3 (slashed bars in Figure 3e, Bex, TBT). In addition, UVI co-treatment significantly inhibited  
344 *runx2* induction by T3 (slashed bar in Figure 3e, UVI). T3 did not regulate the expression of *runx3*, nor  
345 did we see activation of certain *runx2* downstream targets like *coll10a1* (collagen10 $\alpha$ 1) (data not shown).

346

#### 347 **RXR agonists potentiate T3-action in TH-competent (NF 54) tadpoles**

348 While 1wk-PF tadpoles are considered only partially competent to respond to THs, tadpoles at  
349 NF 54 (approximately 26 days PF) are considered fully competent to respond to THs and to be entering  
350 metamorphosis (21,49,61). We raised tadpoles to NF 54, using hind limb development to determine the  
351 developmental stage (59), and then treated them with 10 nM T3 in the presence and absence of 30 nM  
352 Bex to investigate whether the RXR agonist could still potentiate the action of T3 in a fully competent  
353 tadpole. Tadpoles were treated for three days with compounds (a longer treatment time was not possible  
354 due to the extreme gill resorption in T3 plus Bex animals), and then we measured the LJ angle. Figure 4a  
355 (white boxes) shows that T3-alone caused a small but significant decrease in the lower jaw angle. As in  
356 NF 48 tadpoles, Bex-only treatment had no effect on the lower jaw morphology—tadpoles were  
357 indistinguishable from vehicle-treated. Bex co-treatment with T3 significantly potentiated the decrease in  
358 the LJ angle at this later stage of growth (Figure 4a), suggesting that the ability to increase the  
359 competence for T3 in the lower jaw was still possible, even for these presumed fully competent animals.

360

361 **Figure 4:** RXR agonists potentiate T3 action in the LJ in pro-metamorphic NF 54 tadpoles. a. Bex  
362 potentiates the T3-induced decrease in the LJ angle in NF 54 tadpoles treated for three days. Boxes and  
363 statistics are as in Figure 1 (n = 14 jaws from 3 clutches). Statistics show results from Sidak's multiple  
364 comparison test in conjunction with 2-way ANOVA (\*\*\*\*, p < 0.0001; \*\*\*, p < 0.001; \*, p < 0.05). b.  
365 TBT potentiates T3-inducible, integrated luciferase reporter expression in the LJ of NF 54 tadpoles.

366

367           Previously we developed a transgenic line of *X. laevis* frogs that express firefly luciferase (Luc)  
368 under the regulation of the *X. laevis thibz* TH response elements (TREs) (47,48). In NF 48 tadpoles,  
369 assaying the entire head for Luc activation is required in order to generate a signal robust enough for  
370 statistics. At NF 54 we are able to analyze individual tissues, so we treated NF 54 tadpoles for 2 days with  
371 10 nM T3 in the presence and absence of 2 nM TBT, and then we excised the lower jaws as we did for  
372 gene expression analysis. Luc activity was determined in the lower jaw samples and was normalized to  
373 the protein concentration of each sample. We assayed two clutches independently using two different  
374 TRE-Luc-bearing F2 male frogs to generate embryos with two different wild-type female frogs. TRE-Luc  
375 F2 males, even though they arise from the same founder female, display different levels of Luc activation  
376 by T3 that are nonetheless consistent within a clutch. Figure 4B shows the results of both clutches  
377 individually, showing the different levels of T3 activation between the two clutches. For clutch 2, a TBT-  
378 only treatment was also included and showed no activation. Using a 2-way ANOVA analysis of the  
379 combined data from both clutches where treatment and clutch were covariates, clutch was a significant  
380 source of variance ( $p = 0.0005$ ), as was treatment ( $p < 0.0001$ ). Using a Tukey multiple comparisons test  
381 post hoc on the combined clutch data, TBT significantly potentiated the T3 activation of the Luc reporter  
382 ( $p = 0.0092$ ). This result indicates that the RXR agonists at this high-TH-competence stage could further  
383 increase the competence of LJ tissue for T3 at the beginning of natural metamorphosis.

384

385

386



387 Discussion

388

389 In this report we have expanded upon our earlier findings concerning the ability of RXR agonists  
390 to function as a competence factor for TH signaling during vertebrate development (47,48,50). The poor  
391 biological outcomes that arise from insufficient or inappropriate TH during development have  
392 demonstrated the need for assessing the ability of man-made chemicals present in the environment to  
393 disrupt those signaling pathways.

394 In order to look at TH disruption in vivo and during development, we have used amphibian  
395 metamorphosis of the African clawed frog, *Xenopus laevis*. Metamorphosis performs two reciprocal  
396 functions: 1) development of adult tissues and organs required for life as a frog, and 2) removal of larval  
397 tissues no longer needed by the adult frog. Limb formation and growth and lung development are  
398 examples of development of new tissues and organs, and jaw development is an example of remodeling  
399 that must occur for the herbivorous tadpole to become a carnivorous frog. The other side of the  
400 metamorphic coin involves the resorption of larval tissues that are no longer required in the frog, such as  
401 gills and the tail. Naturally, removal of larval tissues must occur after the adult tissues have developed  
402 and become functional. For example, tail resorption is the last step in metamorphosis because it must  
403 occur after limb development is complete and the limbs are functional for locomotion. Under natural  
404 development, it takes approximately two months to go from a fertilized egg through a larval tadpole to a  
405 juvenile frog, with the metamorphic transition from tadpole to frog taking approximately 4.5 weeks under  
406 ideal conditions (13,18,21,59).

407 Our studies here employed a precocious metamorphosis assay, to determine whether a disruptor  
408 of TH signaling, which we have previously described disrupting larval tissue resorption phenotypes  
409 (47,50), can also disrupt a larval-to-adult remodeling function, namely, cartilage development in the LJ.  
410 By using 1wk-PF tadpoles, we were able to control the dose of TH, as tadpoles at this age do not yet  
411 synthesize THs. In this scenario, T3 and the potential disrupting chemicals taken up by the tadpole  
412 through administration in the rearing water. Although the LJ of the 1wk-PF tadpole is not able to support

413 normal metamorphic changes to the LJ, molecularly the LJ can respond to T3 administration with  
414 reproducible morphological and molecular readouts.

415         Previously, we found that both the pharmaceutical RXR agonist Bex and the environmental RXR  
416 agonist TBT disrupted TH signaling in 1wk-PF tadpoles by significantly potentiating the ability of T3 to  
417 drive gill and tail resorption. Furthermore, the RXR antagonist UVI abrogated T3 action. Bex and TBT  
418 functioned identically in a global transcriptomic analysis of T3 signaling in the tail (50), indicating that  
419 TBT was functioning as a bona fide RXR agonist (43,44,46,69–72). Here, we show that the RXR agonists  
420 potentiate T3 action in the LJ by accelerating the rate of change and by increasing the potency of each T3  
421 dose. As in the tail, TBT and Bex behaved nearly identically in the LJ independent of the experimental  
422 readout. In addition, the RXR antagonist abrogated the morphological changes induced by T3. We also  
423 measured the ability of the agonists and antagonist to disrupt T3-induced cellular proliferation. TBT and  
424 Bex both significantly potentiated proliferation, but UVI did not inhibit it. These findings suggest that the  
425 mechanisms of RXR agonist potentiation and of RXR antagonist inhibition are not strictly reciprocal.  
426 Furthermore, in contrast to their effects on proliferation, the opposite was seen in their effects on the T3-  
427 induction of the *thibz* gene. There, the RXR agonists had no effect, and the RXR antagonist significantly  
428 inhibited *thibz* activation. This was also seen in tail expression of *thibz* (50). How the agonists and  
429 antagonist are working at the molecular level is beyond the scope of these studies, but more than one  
430 mechanism is in play. Interestingly, RXR agonists and the antagonist do not always behave in a  
431 reciprocal manner at all molecular or cellular targets when examined in detail.

432         UVI prevented morphological changes to the LJ in the presence of T3 but did not inhibit cellular  
433 proliferation, which suggests that cellular proliferation was not the main driver behind the morphological  
434 narrowing of the LJ. A better fit to the morphology patterns observed with RXR agonists and antagonist  
435 modulation of the LJ T3 response is the expression patterns of the matrix metalloproteases we tested.  
436 Both *mmp11* and *mmp13l* expression levels were potentiated by RXR agonists and inhibited by UVI. This  
437 was also true for the transcription factor *runx2*, which in mice is required for formation of ossified bones  
438 (73). In *Xenopus* and zebrafish, *runx2* is required earlier for cranial cartilage formation (67,68), but in our

439 hands, it was significantly activated by T3 exposure, and that activation was potentiated by the RXR  
440 agonists and inhibited by UVI. We believe this is the first example of T3 activating *runx2* expression. In  
441 human thyroid cancer and breast cancer cells, TR $\beta$  suppressed the expression of *runx2* in the presence of  
442 TH, acting as a tumor suppressor (74,75).

443 An advantage of using 1wk-PF tadpoles for characterizing disruptors of TH signaling is the size  
444 uniformity of the tadpoles. We normally don't have to normalize to the vehicle-treated control in each  
445 clutch, as we didn't in Figure 1. However, as the tadpoles age, this size uniformity disappears, making  
446 morphological measurements more intrusive, as the animals must be housed separately and anesthetized  
447 and photographed before treatment for individual comparisons to after treatment changes. An advantage  
448 of assaying the LJ angle, is that it does not scale with tadpole head size; therefore, tadpoles can be group  
449 housed and measured only after fixation at the end of treatment. This provides a facile assay for TH  
450 disruption over developmental time, which in the case of RXR ligands, as they affect TH competence,  
451 could change as the animal develops and intrinsically increases in TH competence.

452 That said, we also chose NF 54 to assess whether the RXR agonists could still potentiate T3  
453 action in the LJ because that is when plasma T3 is first detectable, and therefore, NF 54 is often  
454 considered the dividing line between premetamorphic and metamorphic tadpoles (21). However, NF 54 is  
455 nearly three weeks before metamorphic morphological changes in the jaw become apparent at NF 59 (51),  
456 and it is approximately two weeks before exogenous T3 leads to normal metamorphic development in the  
457 LJ. Therefore, TH competence in the LJ may still not be complete at NF 54 so that the cartilages can  
458 continue to develop in their normal T3-independent fashion until they are in the form that can remodel  
459 appropriately to an adult jaw. Thus, as prometamorphosis proceeds, the animal may be vulnerable to  
460 inappropriate RXR ligand activity from the environment. Ordinarily, endogenous retinoids can be  
461 controlled by the P450 retinoid-degrading enzymes, (76,77), yet organotins, or other as yet unknown  
462 chemicals in the environment that activate RXR, evade this buffer, and, therefore, still pose a unique and  
463 challenging problem for the exquisitely timed process of metamorphosis.

464

465 Acknowledgements:

466 The authors would like to acknowledge Michael L. Goodson for blinding the images for counting

467 proliferative cells.

468

469 References

- 470 1. Leitch VD, Bassett JHD, Williams GR. Role of thyroid hormones in craniofacial development.  
471 Nat Rev Endocrinol [Internet]. 2020;16(3):147–64. Available from:  
472 <http://dx.doi.org/10.1038/s41574-019-0304-5>
- 473 2. Duncan Bassett JH, Williams GR. Role of thyroid hormones in skeletal development and bone  
474 maintenance. Endocr Rev. 2016;37(2):135–87.
- 475 3. Gouveia CHA, Miranda-Rodrigues M, Martins GM, Neofiti-Papi B. Thyroid Hormone and  
476 Skeletal Development. Vitam Horm [Internet]. 1st ed. 2018;106:383–472. Available from:  
477 <http://dx.doi.org/10.1016/bs.vh.2017.06.002>
- 478 4. Lindsey RC, Aghajanian P, Mohan S. Thyroid Hormone Signaling in the Development of the  
479 Endochondral Skeleton [Internet]. 1st ed. Vol. 106, Vitamins and Hormones. Elsevier Inc.; 2018.  
480 351–381 p. Available from: <http://dx.doi.org/10.1016/bs.vh.2017.06.003>
- 481 5. Bianco AC, Dumitrescu A, Gereben B, Ribeiro MO, Fonseca TL, Fernandes GW, et al. Paradigms  
482 of Dynamic Control of Thyroid Hormone Signaling. Endocr Rev [Internet]. 2019;40(4):1000–47.  
483 Available from: <http://www.ncbi.nlm.nih.gov/pubmed/31033998>
- 484 6. Fan X, Wu L. The impact of thyroid abnormalities during pregnancy on subsequent  
485 neuropsychological development of the offspring: a meta-analysis. J Matern Neonatal Med.  
486 2016;29(24):3971–6.
- 487 7. Forhead AJ, Fowden AL. Thyroid hormones in fetal growth and prepartum maturation. J  
488 Endocrinol [Internet]. 2014 Jun;221(3):R87–103. Available from:  
489 <http://www.ncbi.nlm.nih.gov/pubmed/24648121>
- 490 8. Patel J, Landers K, Li H, Mortimer RH, Richard K. Thyroid hormones and fetal neurological  
491 development. J Endocrinol. 2011;209(1):1–8.
- 492 9. Labadzhyan A, Brent GA, Hershman JM, Leung AM. Thyrotoxicosis of Pregnancy. J Clin Transl  
493 Endocrinol [Internet]. 2014 Dec 1;1(4):140–4. Available from:  
494 <http://dx.doi.org/10.1016/j.jcte.2014.07.008>

- 495 10. Nunez J, Celi FS, Ng L, Forrest D. Multigenic control of thyroid hormone functions in the nervous  
496 system. *Mol Cell Endocrinol* [Internet]. 2008 Jun 11;287(1–2):1–12. Available from:  
497 <http://www.ncbi.nlm.nih.gov/pubmed/18448240>
- 498 11. Buchholz DR. More similar than you think: Frog metamorphosis as a model of human perinatal  
499 endocrinology. *Dev Biol* [Internet]. 2015;408(2):188–95. Available from:  
500 <http://dx.doi.org/10.1016/j.ydbio.2015.02.018>
- 501 12. Grimaldi A, Buisine N, Miller T, Shi Y-B, Sachs LM. Mechanisms of thyroid hormone receptor  
502 action during development: lessons from amphibian studies. *Biochim Biophys Acta* [Internet].  
503 2013 Jul;1830(7):3882–92. Available from: <http://dx.doi.org/10.1016/j.bbagen.2012.04.020>
- 504 13. Furlow JD, Neff ES. A developmental switch induced by thyroid hormone: *Xenopus laevis*  
505 metamorphosis. *Trends Endocrinol Metab*. 2006;17(2):38–45.
- 506 14. Sachs LM, Buchholz DR. Frogs model man: In vivo thyroid hormone signaling during  
507 development. *Genesis* [Internet]. 2017 Jan;55(1–2):1–10. Available from:  
508 <http://www.ncbi.nlm.nih.gov/pubmed/28109053>
- 509 15. Das B, Matsuda H, Fujimoto K, Sun G, Matsuura K, Shi Y-B. Molecular and genetic studies  
510 suggest that thyroid hormone receptor is both necessary and sufficient to mediate the  
511 developmental effects of thyroid hormone. *Gen Comp Endocrinol* [Internet]. 2010 Sep  
512 1;168(2):174–80. Available from: <http://dx.doi.org/10.1016/j.ygcen.2010.01.019>
- 513 16. Buchholz DR, Tomita A, Fu L, Paul BD, Shi Y. Transgenic Analysis Reveals that Thyroid  
514 Hormone Receptor Is Sufficient To Mediate the Thyroid Hormone Signal in Frog Metamorphosis.  
515 *Mol Cell Biol*. 2004;24(20):9026–37.
- 516 17. Das B, Heimeier RA, Buchholz DR, Shi Y. Identification of direct thyroid hormone response  
517 genes reveals the earliest gene regulation programs during frog metamorphosis. *J Biol Chem*.  
518 2009;284(49):34167–78.
- 519 18. Brown DD, Cai L. Amphibian metamorphosis. *Dev Biol* [Internet]. 2007 Jun 1;306(1):20–33.  
520 Available from: <http://www.ncbi.nlm.nih.gov/pubmed/17449026>

- 521 19. Mendoza A, Hollenberg AN. New insights into thyroid hormone action. *Pharmacol Ther*  
522 [Internet]. 2017;173:135–45. Available from: <http://dx.doi.org/10.1016/j.pharmthera.2017.02.012>
- 523 20. Brent GA. Mechanisms of thyroid hormone action. *J Clin Invest* [Internet]. 2012  
524 Sep;122(9):3035–43. Available from: <http://www.ncbi.nlm.nih.gov/pubmed/22945636>
- 525 21. Shi Y-B. Life Without Thyroid Hormone Receptor. *Endocrinology* [Internet]. 2021 Apr  
526 1;162(4):1–12. Available from: <http://www.ncbi.nlm.nih.gov/pubmed/33558878>
- 527 22. Kanamori A, Brown DD. The regulation of thyroid hormone receptor beta genes by thyroid  
528 hormone in *Xenopus laevis*. *J Biol Chem* [Internet]. 1992;267(2):739–45. Available from:  
529 <http://www.jbc.org/content/267/2/739.abstract>
- 530 23. Wong J, Liang VCT, Sachs LM, Shi YB. Transcription from the thyroid hormone-dependent  
531 promoter of the *Xenopus laevis* thyroid hormone receptor  $\beta$ A gene requires a novel upstream  
532 element and the initiator, but not a TATA box. *J Biol Chem* [Internet]. 1998;273(23):14186–93.  
533 Available from: <http://dx.doi.org/10.1074/jbc.273.23.14186>
- 534 24. Galton VA. The ups and downs of the thyroxine pro-hormone hypothesis. *Mol Cell Endocrinol*  
535 [Internet]. 2017 Dec 15;458:105–11. Available from: <http://dx.doi.org/10.1016/j.mce.2017.01.029>
- 536 25. Oppenheimer JH, Schwartz HL, Surks MI. Propylthiouracil inhibits the conversion of L-thyroxine  
537 to L-triiodothyronine. An explanation of the antithyroxine effect of propylthiouracil and evidence  
538 supporting the concept that triiodothyronine is the active thyroid hormone. *J Clin Invest*.  
539 1972;51(9):2493–7.
- 540 26. Samuels HH, Tsai JS. Thyroid hormone action. Demonstration of similar receptors in isolated  
541 nuclei of rat liver and cultured GH1 cells. *J Clin Invest*. 1974;53(2):656–9.
- 542 27. Puzianowska-Kuznicka M, Damjanovski S, Shi YB. Both thyroid hormone and 9-cis retinoic acid  
543 receptors are required to efficiently mediate the effects of thyroid hormone on embryonic  
544 development and specific gene regulation in *Xenopus laevis*. *Mol Cell Biol* [Internet]. 1997  
545 Aug;17(8):4738–49. Available from: <http://www.ncbi.nlm.nih.gov/pubmed/9234730>
- 546 28. Dawson MI, Xia Z. The retinoid X receptors and their ligands. *Biochim Biophys Acta* [Internet].

- 547 2012 Jan;1821(1):21–56. Available from:  
548 <http://linkinghub.elsevier.com/retrieve/pii/S1388198111001843>
- 549 29. Yen PM, Sugawara A, Chin WW. Triiodothyronine (T3) differentially affects T3-receptor/retinoic  
550 acid receptor and T3-receptor/retinoid X receptor heterodimer binding to DNA. *J Biol Chem*  
551 [Internet]. 1992 Nov 15;267(32):23248–52. Available from:  
552 <http://www.ncbi.nlm.nih.gov/pubmed/1331079>
- 553 30. Gore AC, Chappell VA, Fenton SE, Flaws JA, Nadal A, Prins GS, et al. Executive Summary to  
554 EDC-2: The Endocrine Society’s second Scientific Statement on endocrine-disrupting chemicals.  
555 *Endocr Rev*. 2015;36(6):593–602.
- 556 31. Freitas J, Cano P, Craig-Veit C, Goodson ML, David Furlow J, Murk AJ. Detection of thyroid  
557 hormone receptor disruptors by a novel stable in vitro reporter gene assay. *Toxicol Vitro* [Internet].  
558 2011;25(1):257–66. Available from: <http://dx.doi.org/10.1016/j.tiv.2010.08.013>
- 559 32. Freitas J, Miller N, Mengeling BJB, Xia M, Huang R, Houck K, et al. Identification of thyroid  
560 hormone receptor active compounds using a quantitative high-throughput screening platform. *Curr*  
561 *Chem genomics Transl Med* [Internet]. 2014;8(1):36–46. Available from:  
562 [http://www.pubmedcentral.nih.gov/articlerender.fcgi?artid=3999704&tool=pmcentrez&rendertype](http://www.pubmedcentral.nih.gov/articlerender.fcgi?artid=3999704&tool=pmcentrez&rendertype=abstract)  
563 [=abstract](http://www.pubmedcentral.nih.gov/articlerender.fcgi?artid=3999704&tool=pmcentrez&rendertype=abstract)
- 564 33. Mengeling BJ, Furlow JD. Pituitary specific retinoid-X receptor ligand interactions with thyroid  
565 hormone receptor signaling revealed by high throughput reporter and endogenous gene responses.  
566 *Toxicol In Vitro* [Internet]. 2015 Oct;29(7):1609–18. Available from:  
567 <http://dx.doi.org/10.1016/j.tiv.2015.06.018>
- 568 34. Allenby G, Bocquel MT, Saunders M, Kazmer S, Speck J, Rosenberger M, et al. Retinoic acid  
569 receptors and retinoid X receptors: Interactions with endogenous retinoic acids. *Proc Natl Acad*  
570 *Sci U S A*. 1993;90(1):30–4.
- 571 35. Evans RM, Mangelsdorf DJ. Nuclear receptors, RXR, and the big bang. *Cell* [Internet].  
572 2014;157(1):255–66. Available from: <http://dx.doi.org/10.1016/j.cell.2014.03.012>



- 573 36. Forman BM, Umesono K, Chen J, Evans RM. Unique response pathways are established by  
574 allosteric interactions among nuclear hormone receptors. *Cell* [Internet]. 1995 May 19;81(4):541–  
575 50. Available from: <http://www.ncbi.nlm.nih.gov/pubmed/7758108>
- 576 37. Castillo AI, Sánchez-martínez R, Moreno JL, Martínez-iglesias OA, Palacios D, Aranda A, et al.  
577 A Permissive Retinoid X Receptor / Thyroid Hormone Receptor Heterodimer Allows Stimulation  
578 of Prolactin Gene Transcription by Thyroid Hormone and 9- cis -Retinoic Acid. *Mol Cell Biol*  
579 [Internet]. 2004;24(2):502–13. Available from:  
580 <http://www.ncbi.nlm.nih.gov/pubmed/14701725><http://www.pubmedcentral.nih.gov/articlerender.fcgi?artid=PMC343792><http://www.pubmedcentral.nih.gov/articlerender.fcgi?artid=343792&tool=pmcentrez&rendertype=abstract>  
581 <http://www.pubmedcentral.nih.gov/articlerender.fcgi?artid=343792&tool=pmcentrez&rendertype=abstract>  
582 2&tool=pmcentrez&rendertype=abstract
- 583 38. Golden WM, Weber KB, Hernandez TL, Sherman SI, Woodmansee WW, Haugen BR. Single-  
584 dose retinoid rapidly and specifically suppresses serum thyrotropin in normal subjects. *J Clin*  
585 *Endocrinol Metab*. 2007;92(1):124–30.
- 586 39. Liu SHA, Ogilvie KM, Klausing KAY, Lawson MA, Jolley D, Li D, et al. Mechanism of Selective  
587 Retinoid X Receptor Agonist- Induced Hypothyroidism in the Rat. *Pharmacia*. 2002;143(8):2880–  
588 5.
- 589 40. Sherman SI, Gopal J, Haugen BR, Chiu AC, Whaley K, Nowlakha P, et al. Central  
590 hypothyroidism associated with retinoid X receptor-selective ligands. *N Engl J Med* [Internet].  
591 1999 Apr 8;340(14):1075–9. Available from: <http://www.ncbi.nlm.nih.gov/pubmed/10194237>
- 592 41. Horiguchi T, Shiraishi H, Shimizu M, Morita M. Effects of triphenyltin chloride and five other  
593 organotin compounds on the development of imposex in the rock shell, *Thais clavigera*. *Environ*  
594 *Pollut* [Internet]. 1997;95(1):85–91. Available from:  
595 <http://www.ncbi.nlm.nih.gov/pubmed/15093477>
- 596 42. Mensink BP, Kralt H, Vethaak AD, Ten Hallers-Tjabbes CC, Koeman JH, Van Hattum B, et al.  
597 Imposex induction in laboratory reared juvenile *Buccinum undatum* by tributyltin (TBT). *Environ*  
598 *Toxicol Pharmacol*. 2002;11(1):49–65.

- 599 43. Nishikawa J. Involvement of the Retinoid X Receptor in the Development of Imposex Caused by  
600 Organotins in Gastropods. 2004;38(23):6271–6.
- 601 44. Urushitani H, Katsu Y, Kagechika H, Sousa ACA, Barroso CM, Ohta Y, et al. Characterization  
602 and comparison of transcriptional activities of the retinoid X receptors by various organotin  
603 compounds in three prosobranch gastropods; *Thais clavigera*, *Nucella lapillus* and *Babylonia*  
604 *japonica*. *Aquat Toxicol* [Internet]. 2018 Jun;199(March):103–15. Available from:  
605 <https://doi.org/10.1016/j.aquatox.2018.03.029>
- 606 45. Castro LFC, Lima D, Machado A, Melo C, Hiromori Y, Nishikawa J, et al. Imposex induction is  
607 mediated through the Retinoid X Receptor signalling pathway in the neogastropod *Nucella*  
608 *lapillus*. *Aquat Toxicol* [Internet]. 2007 Nov 15;85(1):57–66. Available from:  
609 <http://www.ncbi.nlm.nih.gov/pubmed/17875330>
- 610 46. le Maire A, Grimaldi M, Roecklin D, Dagnino S, Vivat-Hannah V, Balaguer P, et al. Activation of  
611 RXR-PPAR heterodimers by organotin environmental endocrine disruptors. *EMBO Rep*  
612 [Internet]. 2009 Apr;10(4):367–73. Available from:  
613 <http://www.ncbi.nlm.nih.gov/pubmed/19270714>
- 614 47. Mengeling BJ, Murk AJ, Furlow JD. Trialkyltin Retinoid-X Receptor Agonists Selectively  
615 Potentiate Thyroid Hormone Induced Programs of *Xenopus laevis* Metamorphosis. *Endocrinology*  
616 [Internet]. 2016 Jul;157(7):2712–23. Available from:  
617 <http://www.ncbi.nlm.nih.gov/pubmed/27167774>
- 618 48. Mengeling BJ, Wei Y, Dobrawa LN, Streekstra M, Louisse J, Singh V, et al. A multi-tiered, in  
619 vivo, quantitative assay suite for environmental disruptors of thyroid hormone signaling. *Aquat*  
620 *Toxicol* [Internet]. 2017 Sep;190:1–10. Available from:  
621 <http://www.ncbi.nlm.nih.gov/pubmed/28662416>
- 622 49. Wang Z, Brown DD. Thyroid hormone-induced gene expression program for amphibian tail  
623 resorption. *J Biol Chem*. 1993;268(22):16270–8.
- 624 50. Mengeling BJ, Goodson ML, Furlow JD. RXR Ligands Modulate Thyroid Hormone Signaling

- 625 Competence in Young *Xenopus laevis* Tadpoles. *Endocrinology* [Internet]. 2018 Jul  
626 1;159(7):2576–95. Available from: <http://www.ncbi.nlm.nih.gov/pubmed/29762675>
- 627 51. Rose CS, Cahill JW. How thyroid hormones and their inhibitors affect cartilage growth and shape  
628 in the frog *Xenopus laevis*. *J Anat* [Internet]. 2019;234(1):89–105. Available from:  
629 <https://onlinelibrary.wiley.com/doi/abs/10.1111/joa.12897>
- 630 52. Rose CS, Murawinski D, Horne V. Deconstructing cartilage shape and size into contributions from  
631 embryogenesis, metamorphosis, and tadpole and frog growth. *J Anat*. 2015;226(6):575–95.
- 632 53. Thomson DAR. Meckel’s cartilage in *Xenopus laevis* during metamorphosis: a light and electron  
633 microscope study. *J Anat* [Internet]. 1986 Dec;149:77–87. Available from:  
634 <http://www.ncbi.nlm.nih.gov/pubmed/3693112>
- 635 54. Thomson DAR. A quantitative analysis of cellular and matrix changes in Meckel’s cartilage in  
636 *Xenopus laevis*. *J Anat*. 1987;Vol. 151:249–54.
- 637 55. Nahoum V, Pérez E, Germain P, Rodríguez-Barrios F, Manzo F, Kammerer S, et al. Modulators of  
638 the structural dynamics of the retinoid X receptor to reveal receptor function. *Proc Natl Acad Sci*  
639 *U S A* [Internet]. 2007 Oct 30;104(44):17323–8. Available from:  
640 <http://www.ncbi.nlm.nih.gov/pubmed/17947383>
- 641 56. Schindelin J, Arganda-Carreras I, Frise E, Kaynig V, Longair M, Pietzsch T, et al. Fiji: An open-  
642 source platform for biological-image analysis. *Nat Methods*. 2012;9(7):676–82.
- 643 57. Schindelin J, Rueden CT, Hiner MC, Eliceiri KW. The ImageJ ecosystem: An open platform for  
644 biomedical image analysis. *Mol Reprod Dev*. 2015;82(7–8):518–29.
- 645 58. Schreiber AM, Das B, Huang H, Marsh-armstrong N, Brown DD. Diverse developmental  
646 programs of *Xenopus laevis* metamorphosis are inhibited by a dominant negative thyroid hormone  
647 receptor. 2001;98(19):10739–44.
- 648 59. P.D. Nieuwkoop, J. Faber, John Gerhart MK. Normal Tables of *Xenopus laevis* (Daudin) A  
649 Systematical and Chronological Survey of the Development from the Fertilized Egg Till the End  
650 of Metamorphosis. Garland Science; 1994. 282 p.

- 651 60. Furlow JD, Brown DD. In vitro and in vivo analysis of the regulation of a transcription factor gene  
652 by thyroid hormone during *Xenopus laevis* metamorphosis. *Mol Endocrinol*. 1999;13(12):2076–  
653 89.
- 654 61. Das B, Cai L, Carter MG, Piao YL, Sharov AA, Ko MSH, et al. Gene expression changes at  
655 metamorphosis induced by thyroid hormone in *Xenopus laevis* tadpoles. *Dev Biol*.  
656 2006;291(2):342–55.
- 657 62. Fujimoto K, Nakajima K, Yaoita Y. Expression of matrix metalloproteinase genes in regressing or  
658 remodeling organs during amphibian metamorphosis. *Dev Growth Differ*. 2007;49(2):131–43.
- 659 63. Mathew S, Fu L, Fiorentino M, Matsuda H, Das B, Shi YB. Differential regulation of cell type-  
660 specific apoptosis by stromelysin-3: A potential mechanism via the cleavage of the Laminin  
661 receptor during tail resorption in *xenopus laevis*. *J Biol Chem [Internet]*. 2009;284(27):18545–56.  
662 Available from: <http://dx.doi.org/10.1074/jbc.M109.017723>
- 663 64. Nishimura R, Hata K, Nakamura E, Murakami T, Takahata Y. Transcriptional network systems in  
664 cartilage development and disease. *Histochem Cell Biol [Internet]*. 2018 Apr;149(4):353–63.  
665 Available from: <http://dx.doi.org/10.1007/s00418-017-1628-7>
- 666 65. Komori T. Runx2, an inducer of osteoblast and chondrocyte differentiation. *Histochem Cell Biol*  
667 [Internet]. 2018 Apr;149(4):313–23. Available from: <http://dx.doi.org/10.1007/s00418-018-1640-6>
- 668 66. Komori T. Regulation of Proliferation, Differentiation and Functions of Osteoblasts by Runx2. *Int*  
669 *J Mol Sci [Internet]*. 2019 Apr 4;20(7):1694. Available from: [https://www.mdpi.com/1422-](https://www.mdpi.com/1422-0067/20/7/1694)  
670 [0067/20/7/1694](https://www.mdpi.com/1422-0067/20/7/1694)
- 671 67. Flores MV, Lam EYN, Crosier P, Crosier K. A hierarchy of Runx transcription factors modulate  
672 the onset of chondrogenesis in craniofacial endochondral bones in zebrafish. *Dev Dyn*.  
673 2006;235(11):3166–76.
- 674 68. Kerney R, Gross JB, Hanken J. Runx2 is essential for larval hyobranchial cartilage formation in  
675 *Xenopus laevis*. *Dev Dyn*. 2007;236(6):1650–62.
- 676 69. Nakanishi T, Nishikawa J, Hiromori Y, Yokoyama H, Koyanagi M, Takasuga S, et al. Trialkyltin

- 677 compounds bind retinoid X receptor to alter human placental endocrine functions. *Mol Endocrinol*  
678 [Internet]. 2005 Oct;19(10):2502–16. Available from:  
679 <http://www.ncbi.nlm.nih.gov/pubmed/15941851>
- 680 70. Shoucri BM, Hung VT, Chamorro-García R, Shioda T, Blumberg B. Retinoid X Receptor  
681 Activation During Adipogenesis of Female Mesenchymal Stem Cells Programs a Dysfunctional  
682 Adipocyte. *Endocrinology* [Internet]. 2018;159(8):2863–83. Available from:  
683 <http://www.ncbi.nlm.nih.gov/pubmed/29860300>
- 684 71. Shoucri BM, Martinez ES, Abreo TJ, Hung VT, Moosova Z, Shioda T, et al. Retinoid x receptor  
685 activation alters the chromatin landscape to commit mesenchymal stem cells to the adipose  
686 lineage. *Endocrinology*. 2017;158(10):3109–25.
- 687 72. Hiromori Y, Aoki A, Nishikawa J, Nagase H, Nakanishi T. Transactivation of the human retinoid  
688 X receptor by organotins: use of site-directed mutagenesis to identify critical amino acid residues  
689 for organotin-induced transactivation. *Metallomics* [Internet]. 2015 Jul;7(7):1180–8. Available  
690 from: <http://xlink.rsc.org/?DOI=C5MT00086F>
- 691 73. Komori T, Yagi H, Nomura S, Yamaguchi A, Sasaki K, Deguchi K, et al. Targeted disruption of  
692 *Cbfa1* results in a complete lack of bone formation owing to maturational arrest of osteoblasts.  
693 *Cell* [Internet]. 1997 May 30;89(5):755–64. Available from: [http://dx.doi.org/10.1016/S0092-](http://dx.doi.org/10.1016/S0092-8674(00)80258-5)  
694 [8674\(00\)80258-5](http://dx.doi.org/10.1016/S0092-8674(00)80258-5)
- 695 74. Bolf EL, Gillis NE, Barnum MS, Beaudet CM, Yu GY, Tomczak JA, et al. The Thyroid Hormone  
696 Receptor-RUNX2 Axis: A Novel Tumor Suppressive Pathway in Breast Cancer. *Horm Cancer*  
697 [Internet]. 2020;11(1):34–41. Available from: <http://www.ncbi.nlm.nih.gov/pubmed/31865591>
- 698 75. Carr FE, Tai PWL, Barnum MS, Gillis NE, Evans KG, Taber TH, et al. Thyroid Hormone  
699 Receptor- $\beta$  (TR $\beta$ ) Mediates Runt-Related Transcription Factor 2 (Runx2) Expression in Thyroid  
700 Cancer Cells: A Novel Signaling Pathway in Thyroid Cancer. *Endocrinology* [Internet].  
701 2016;157(8):3278–92. Available from: <http://www.ncbi.nlm.nih.gov/pubmed/27253998>
- 702 76. Marill J, Capron CC, Idres N, Chabot GG. Human cytochrome P450s involved in the metabolism

703 of 9-cis- and 13-cis-retinoic acids. *Biochem Pharmacol* [Internet]. 2002 Mar 1;63(5):933–43.  
704 Available from: <http://www.ncbi.nlm.nih.gov/pubmed/11911845>  
705 77. Topletz AR, Tripathy S, Foti RS, Shimshoni JA, Nelson WL, Isoherranen N. Induction of  
706 CYP26A1 by metabolites of retinoic acid: evidence that CYP26A1 is an important enzyme in the  
707 elimination of active retinoids. *Mol Pharmacol* [Internet]. 2015;87(3):430–41. Available from:  
708 <http://www.ncbi.nlm.nih.gov/pubmed/25492813>  
709  
710  
711







Figure 2

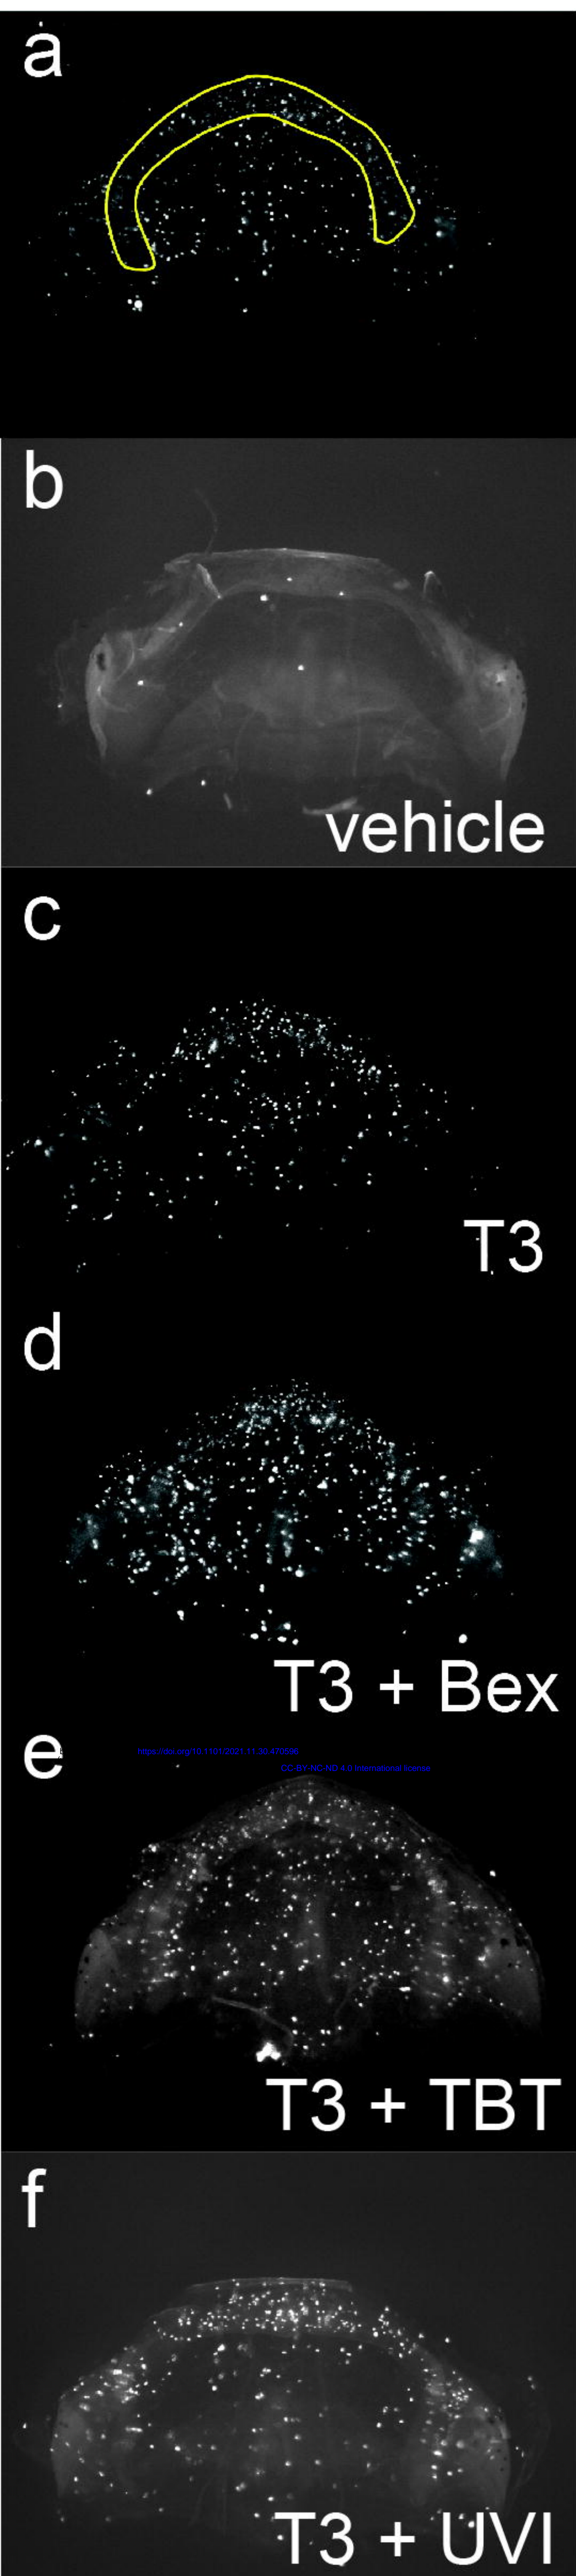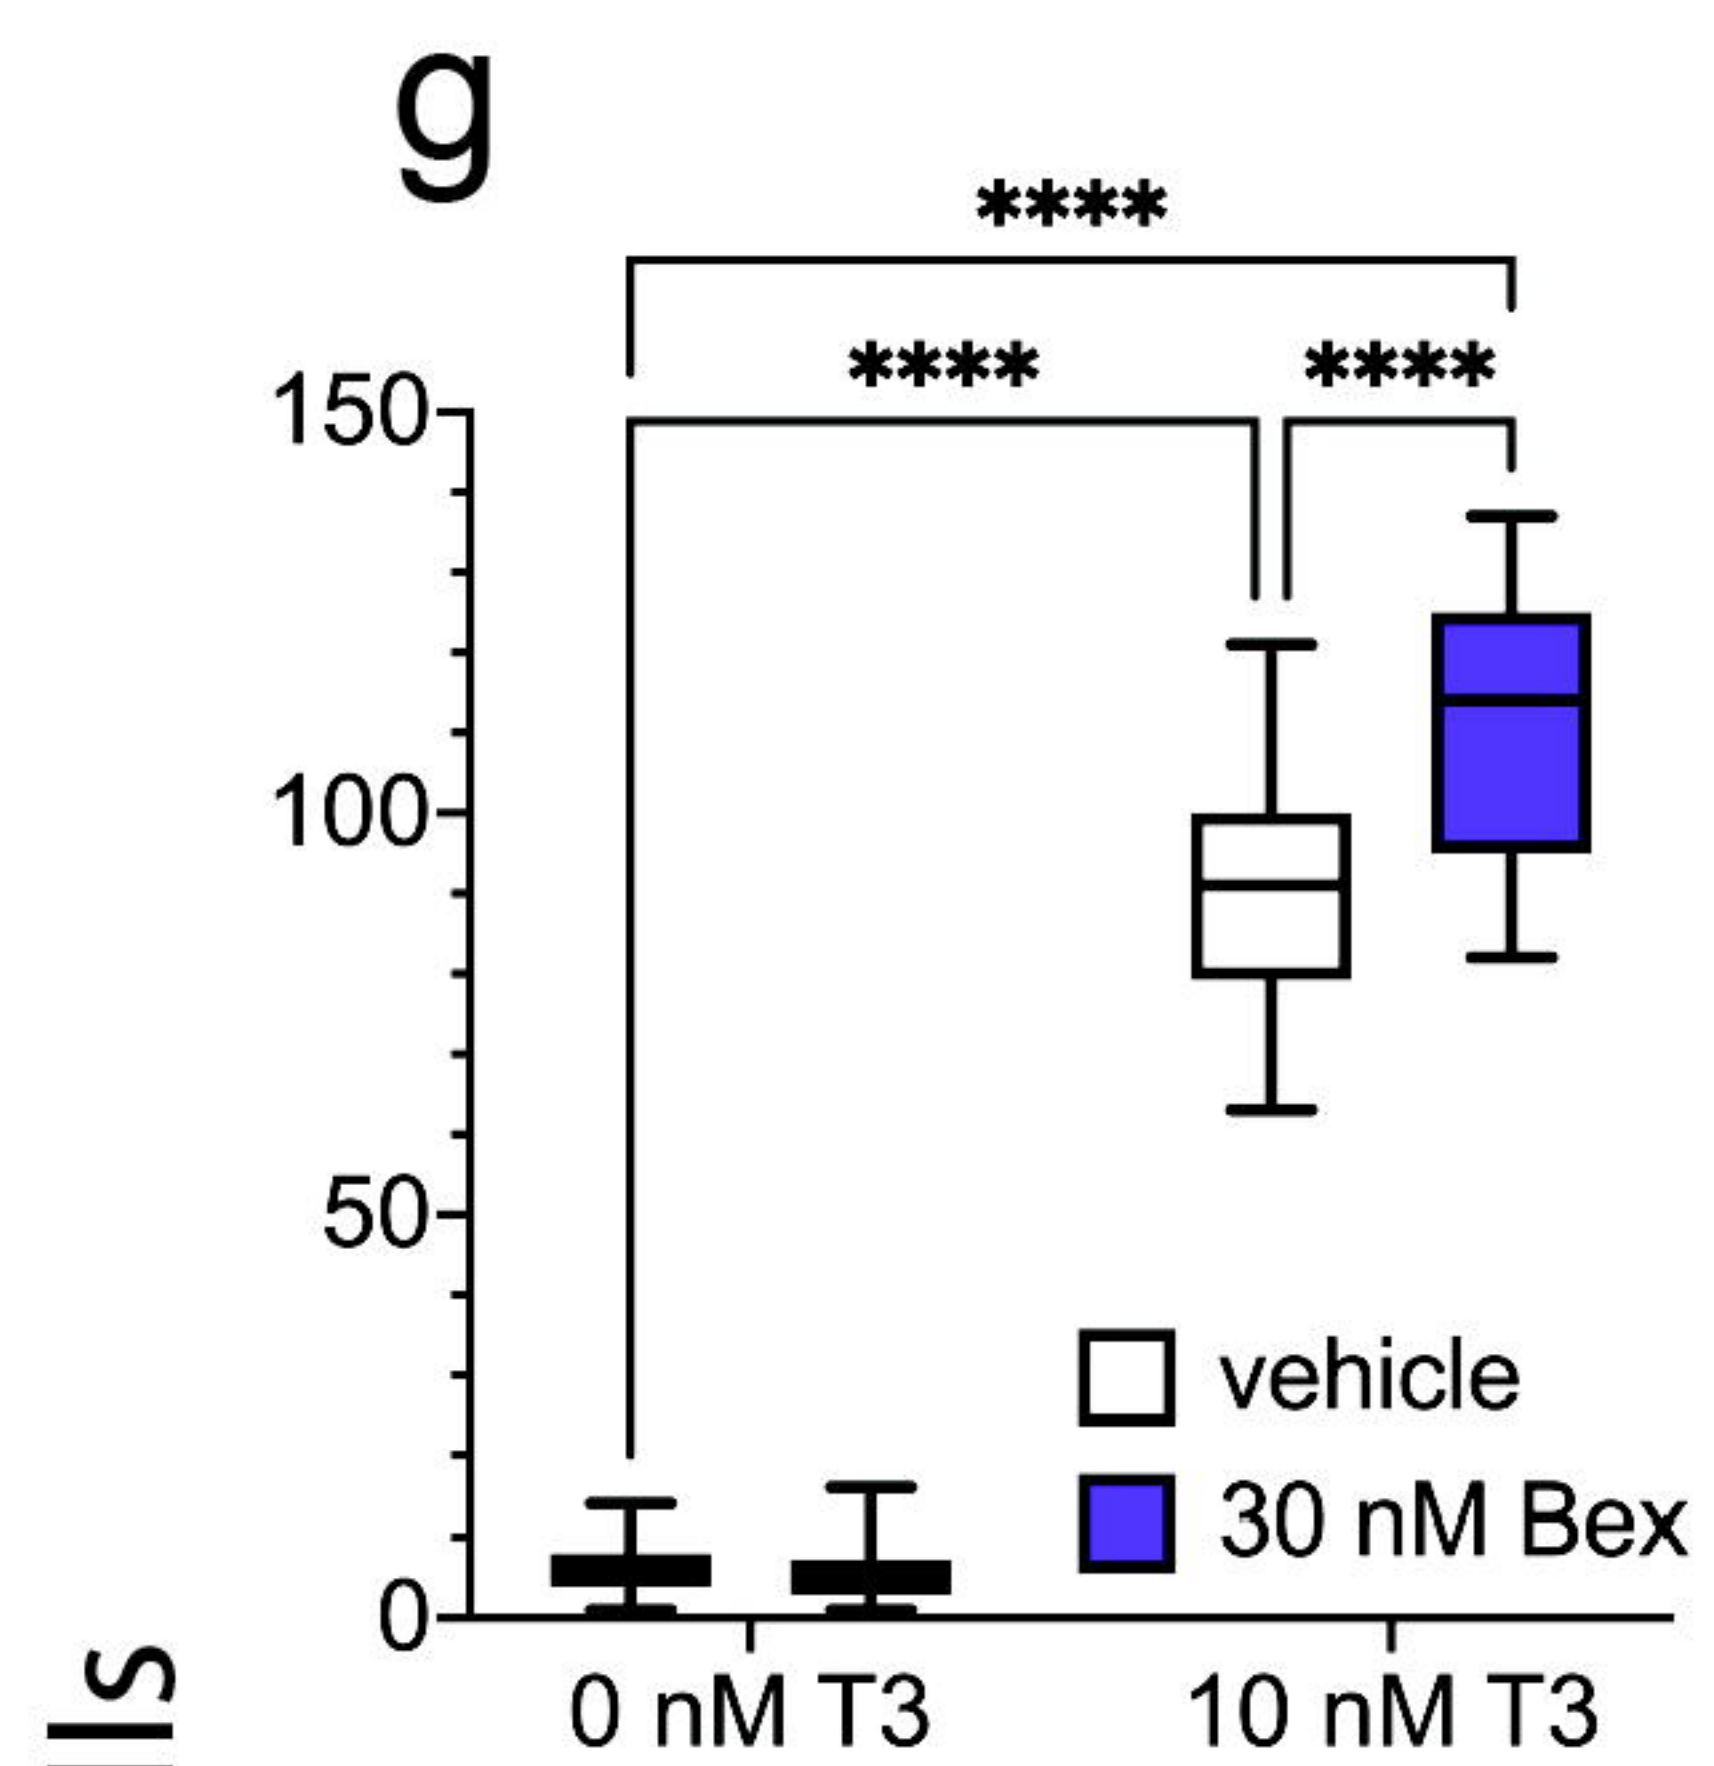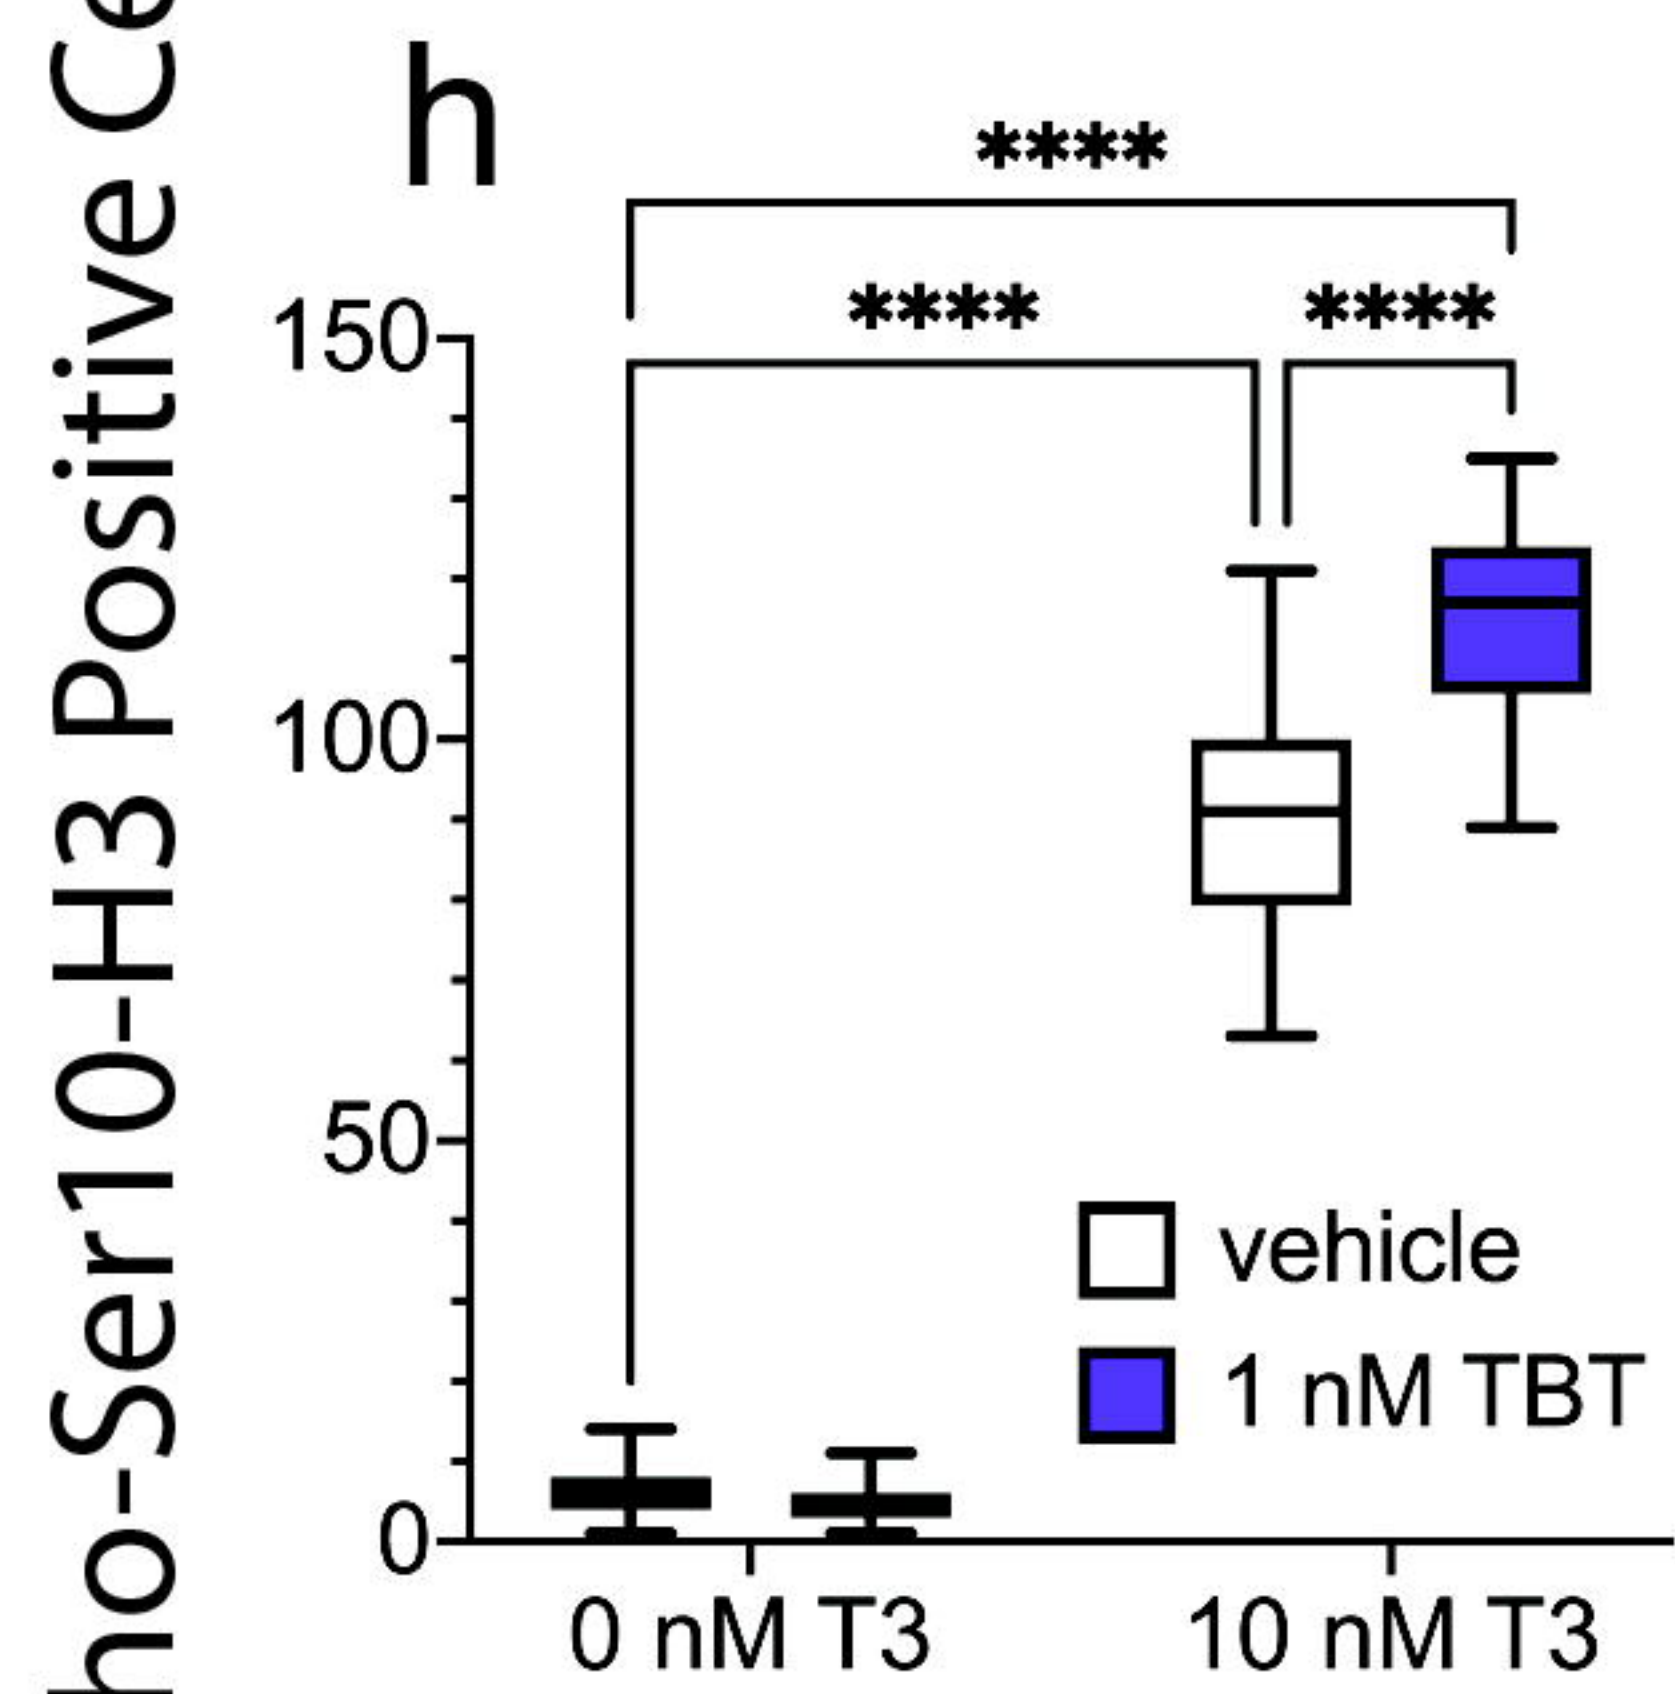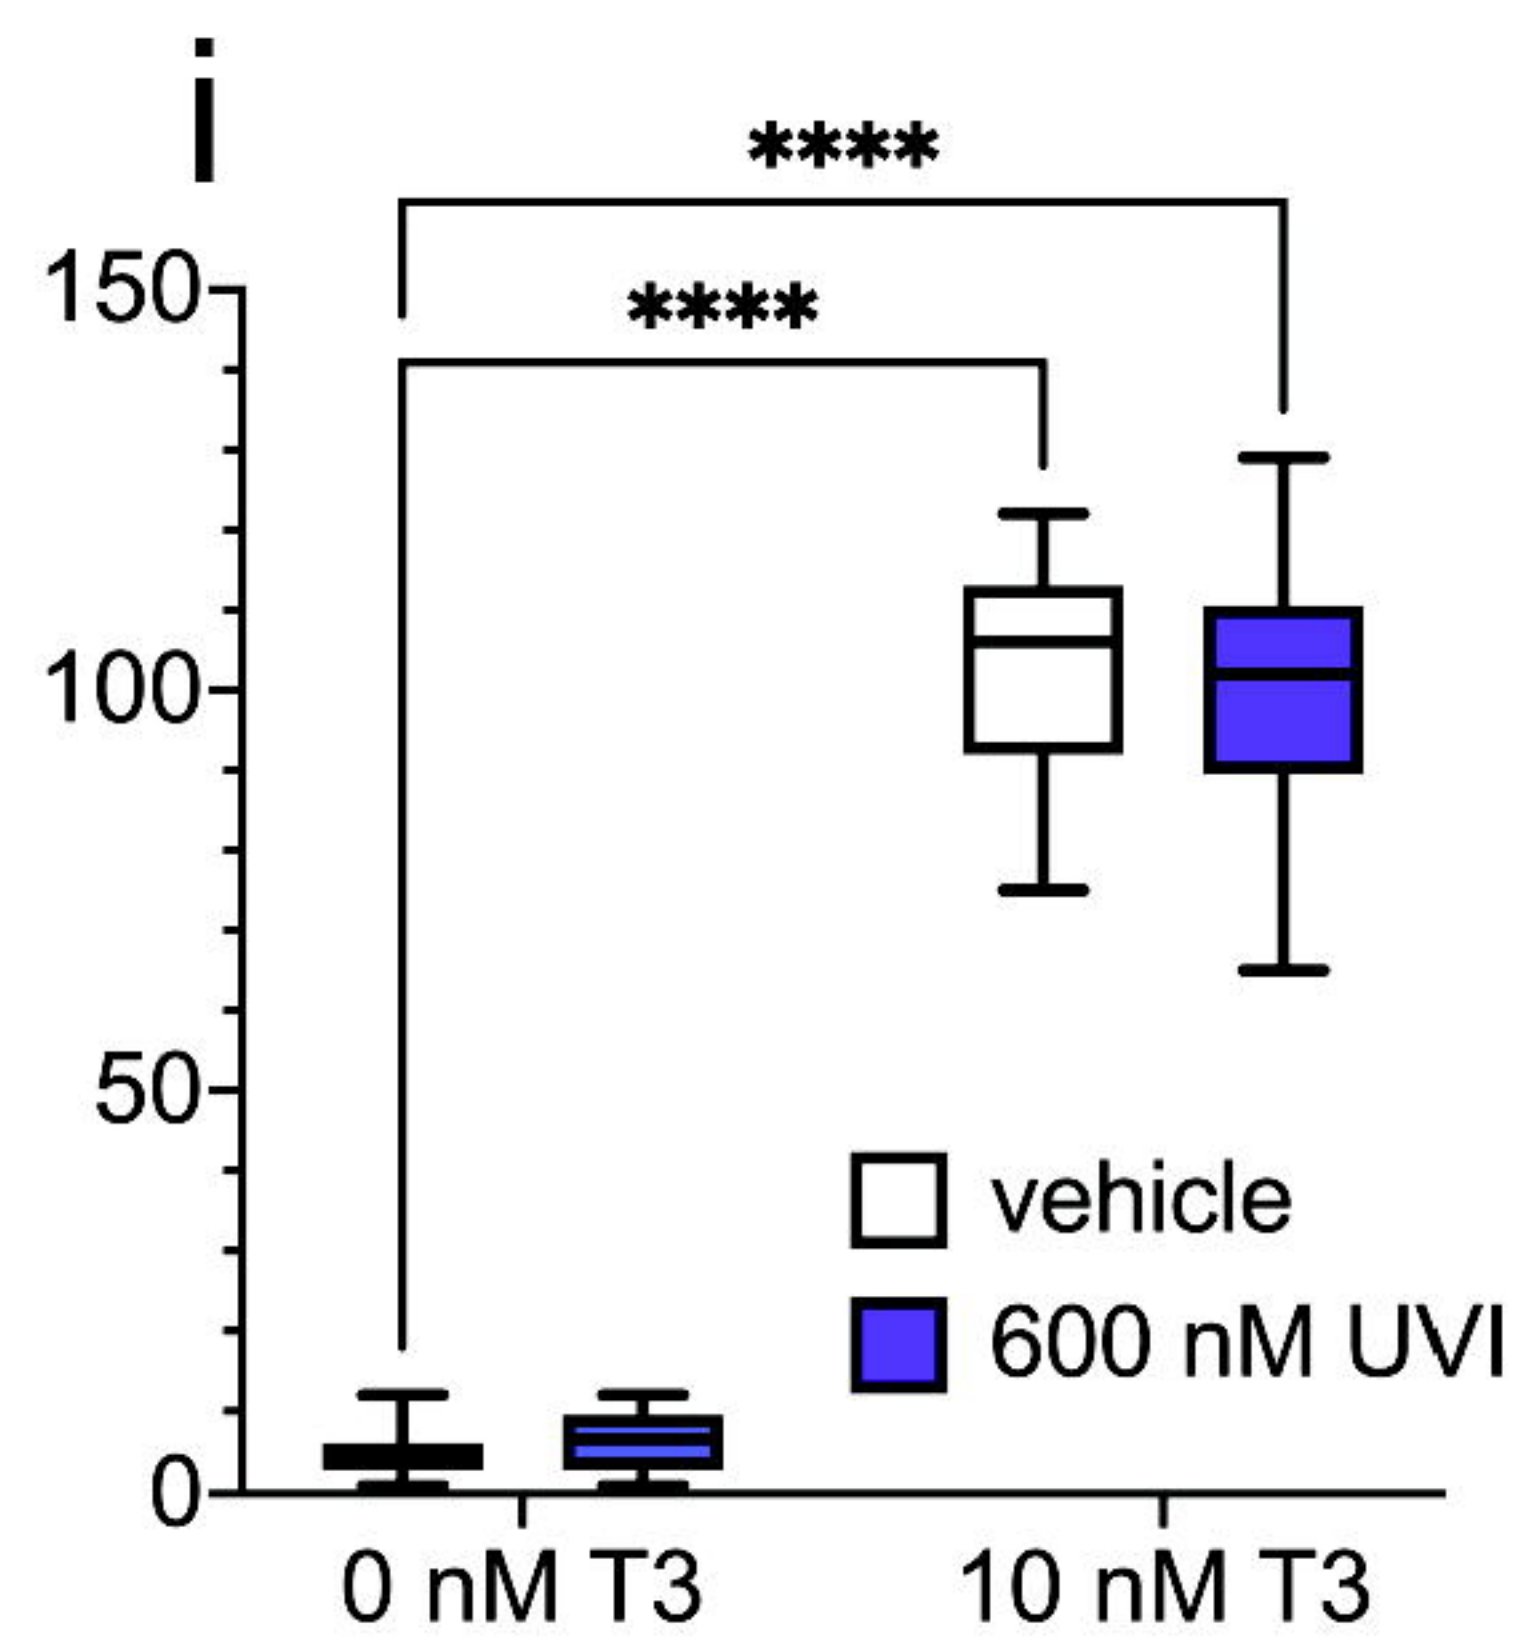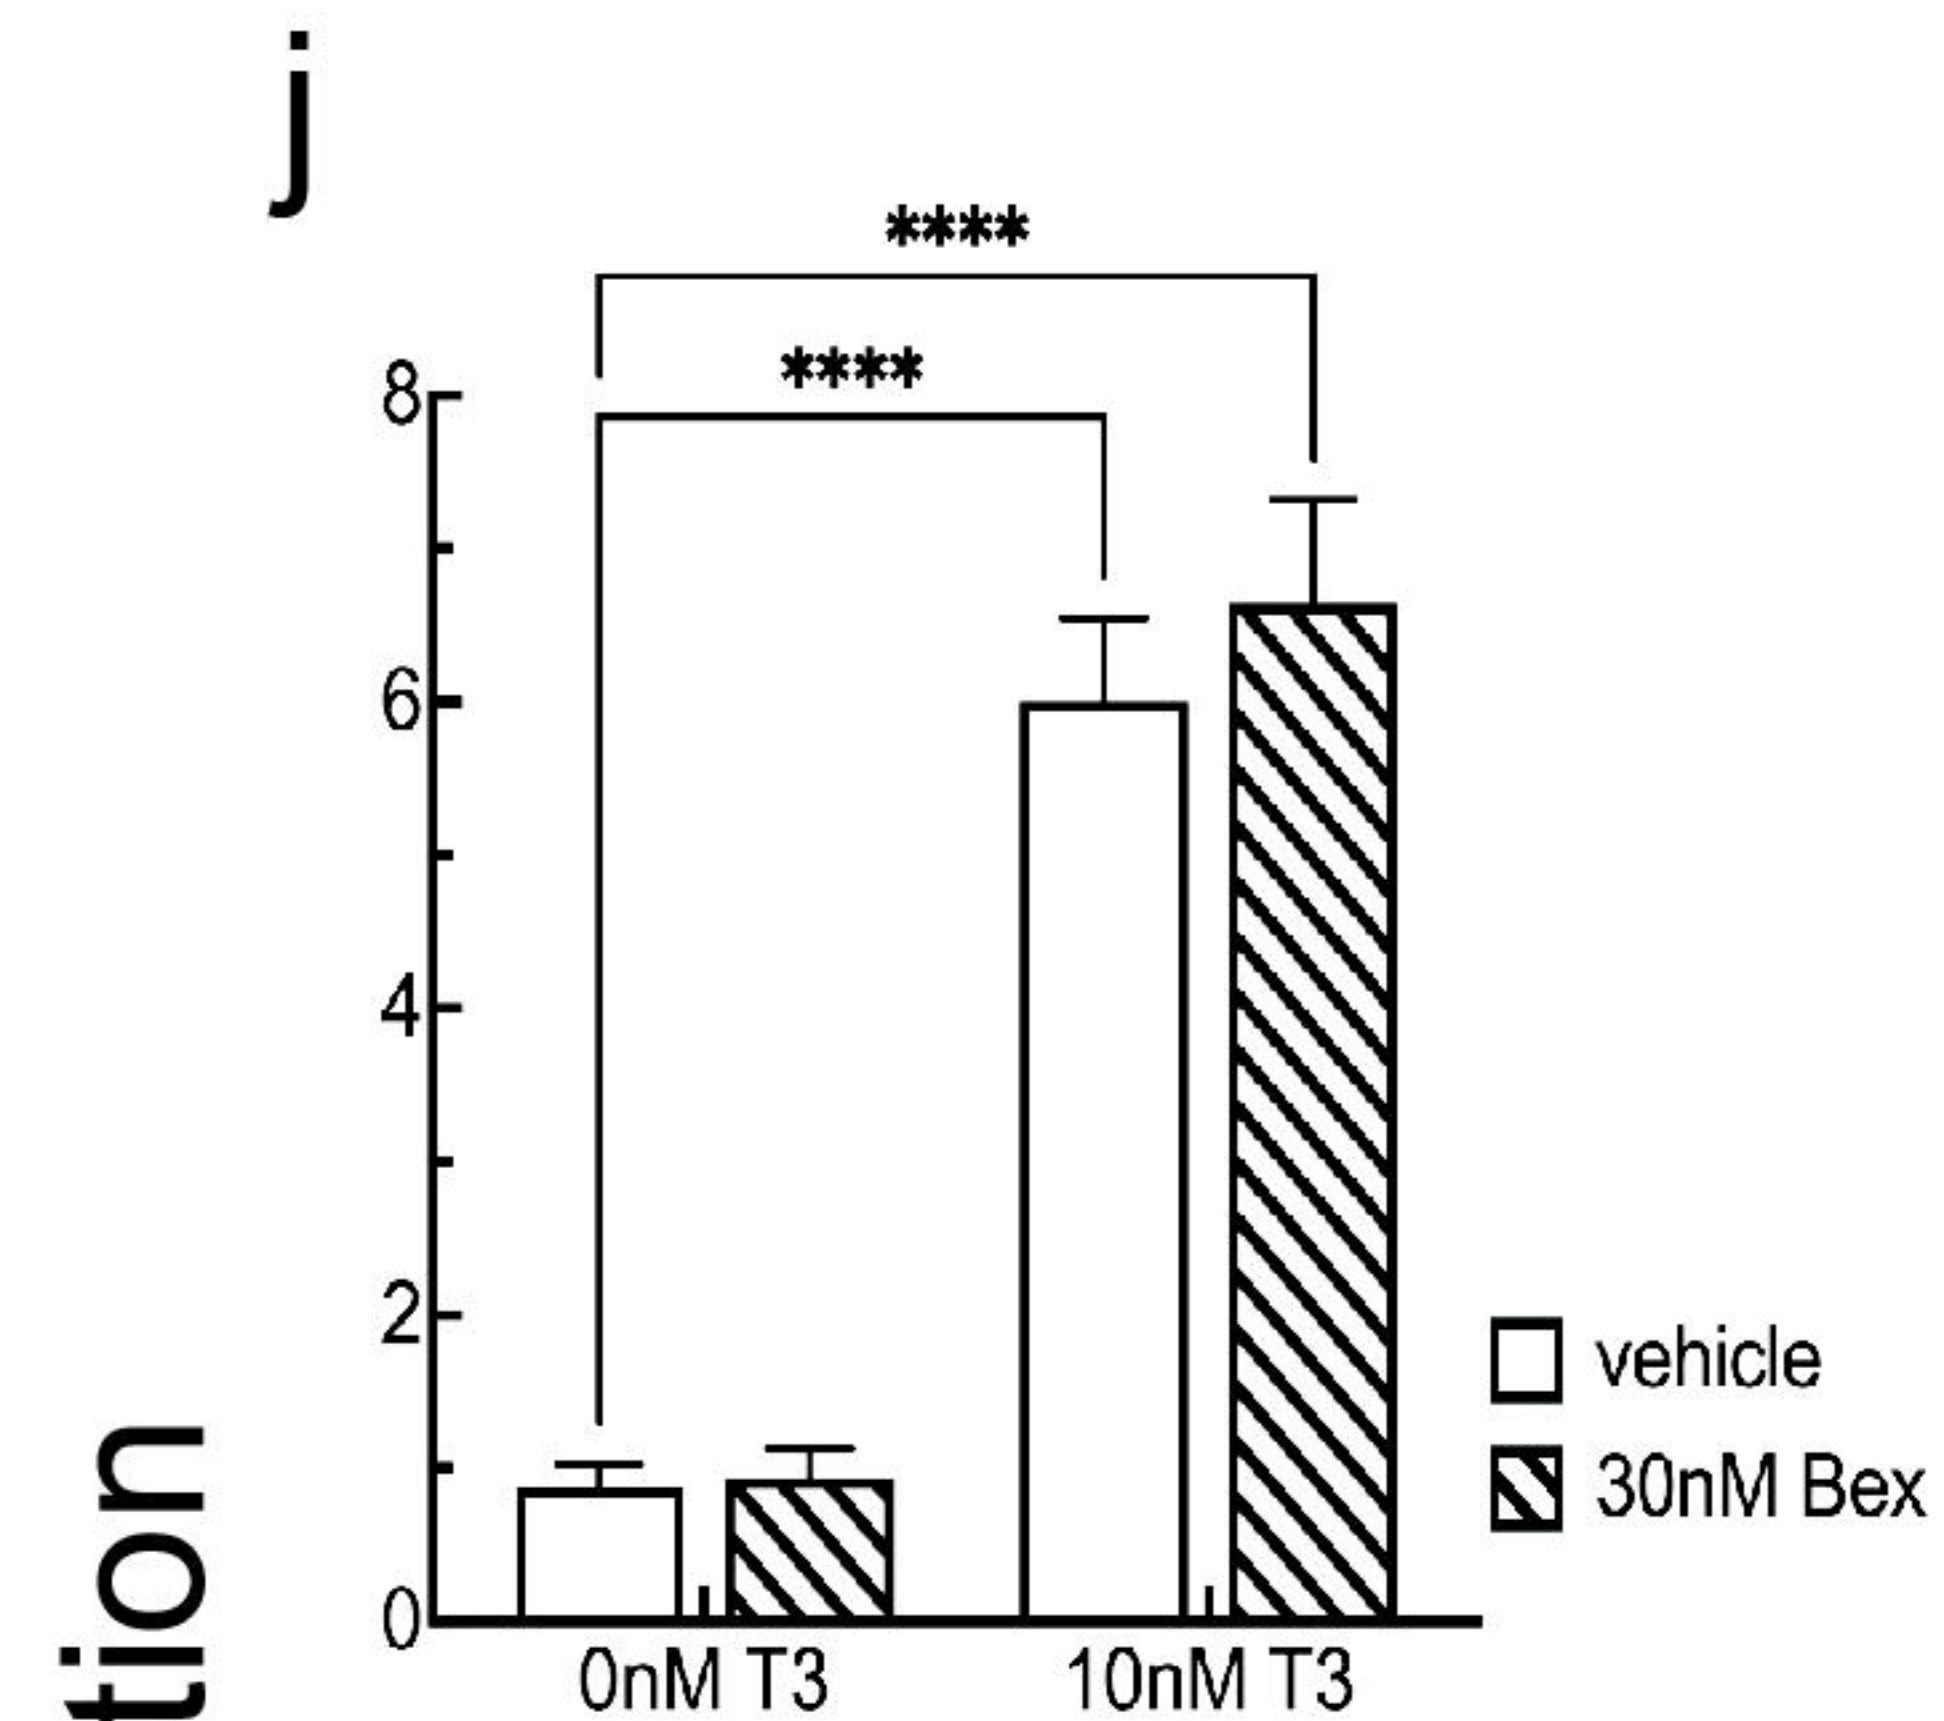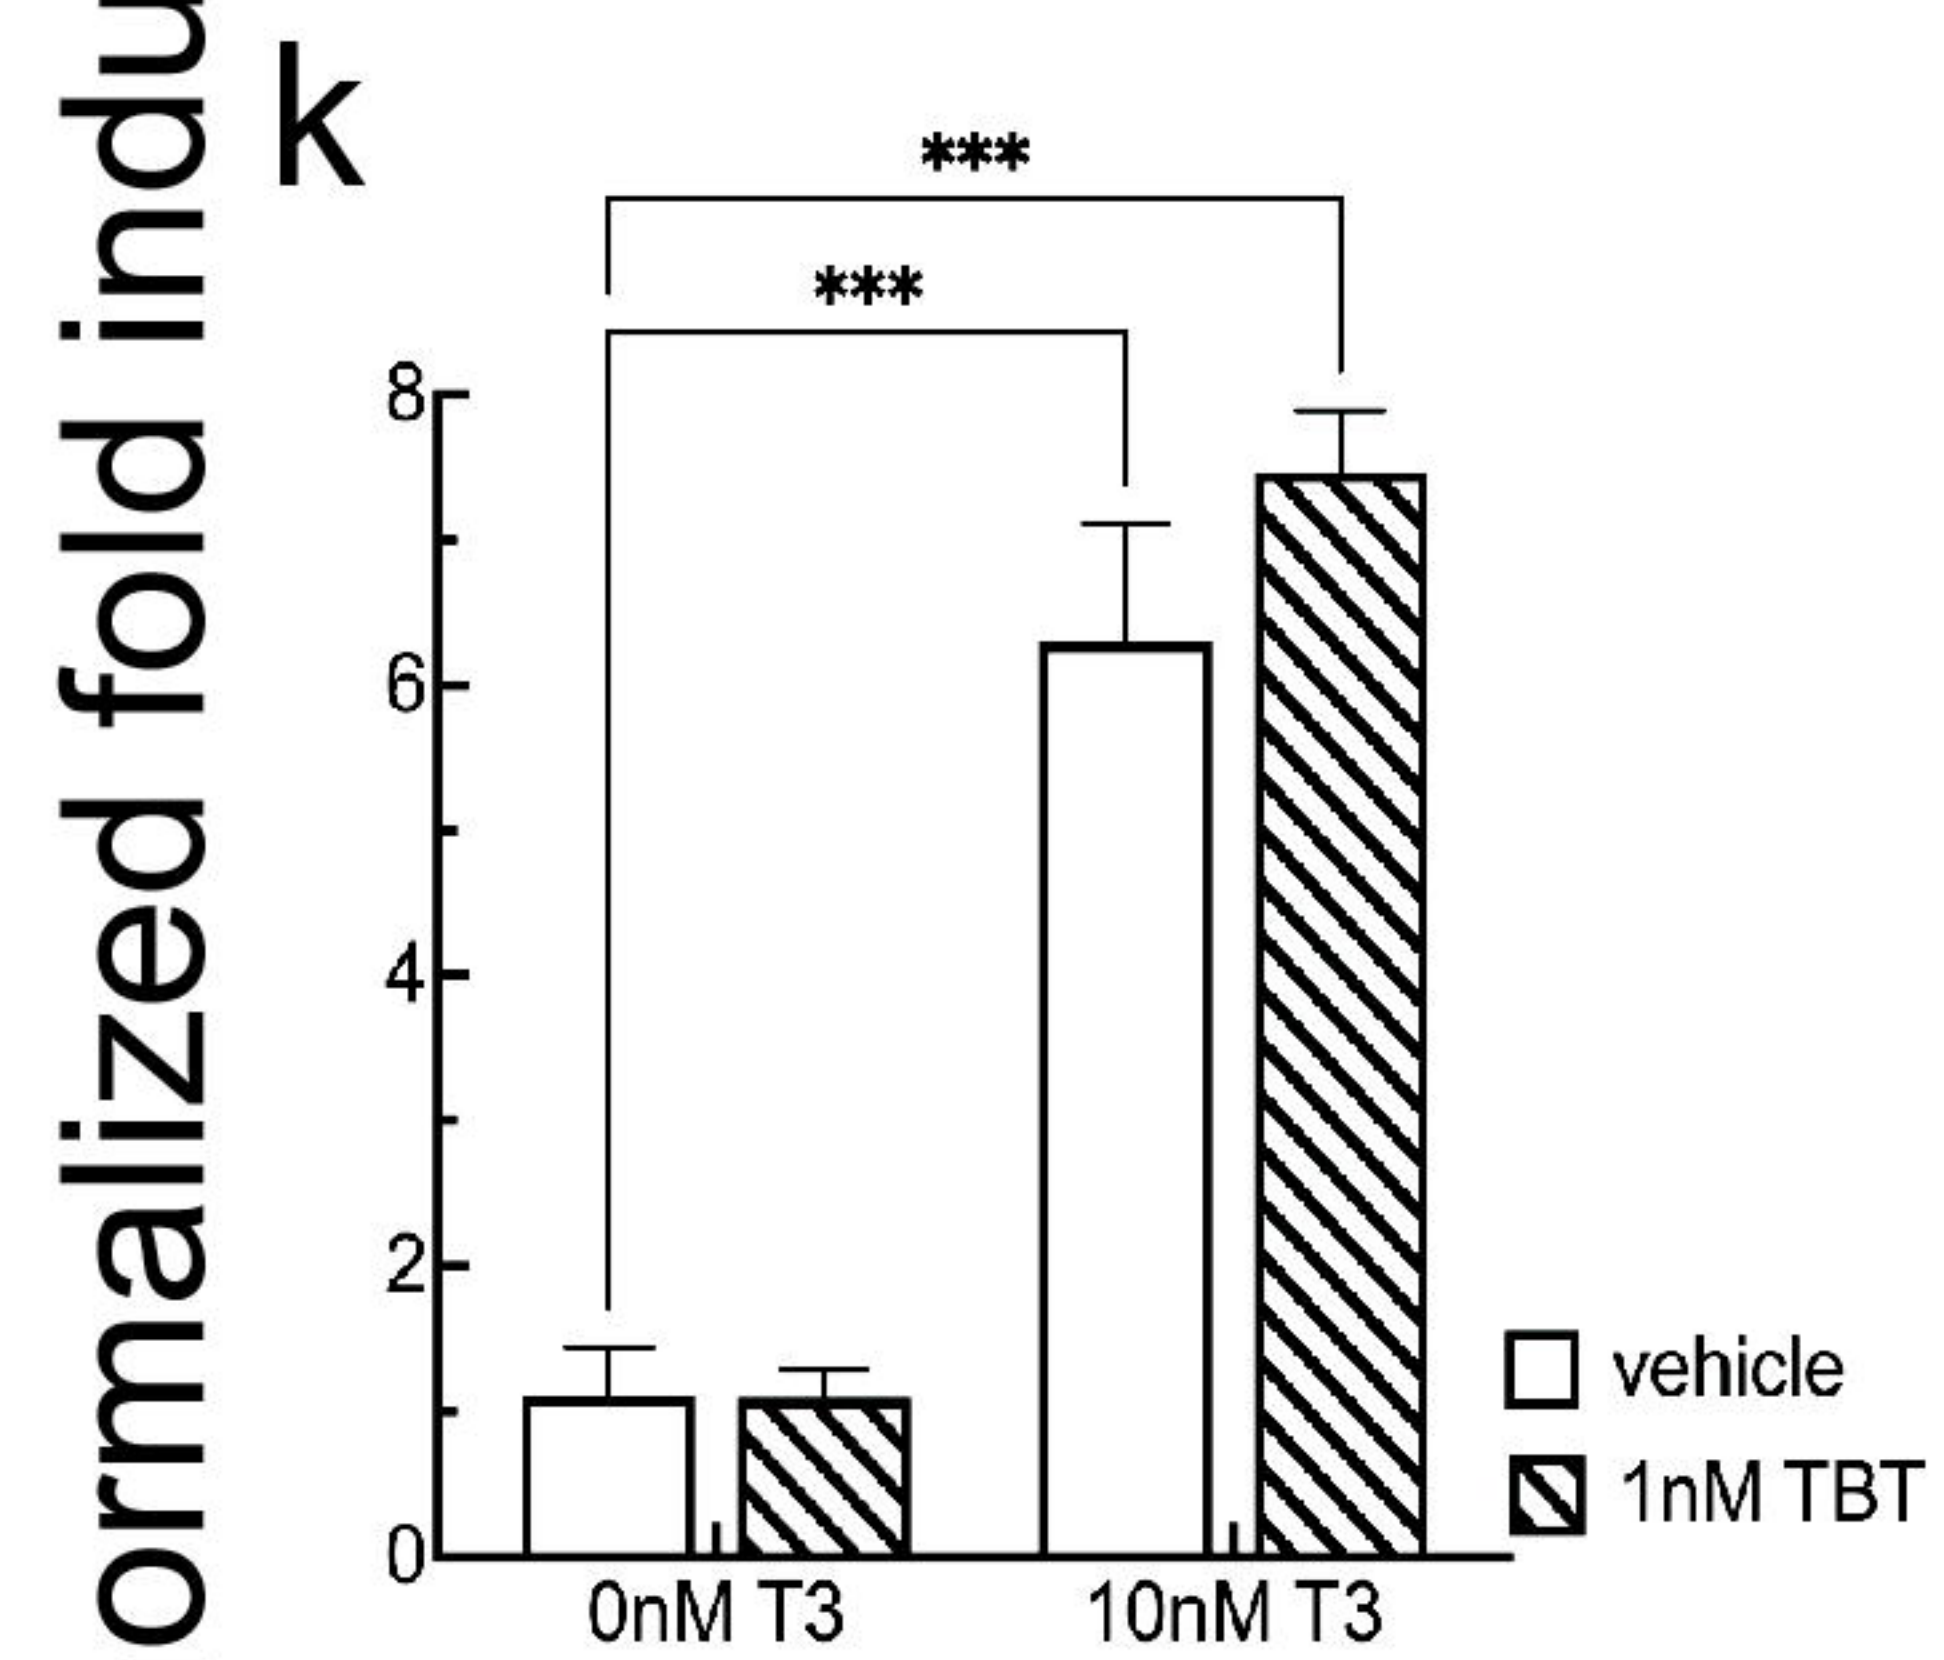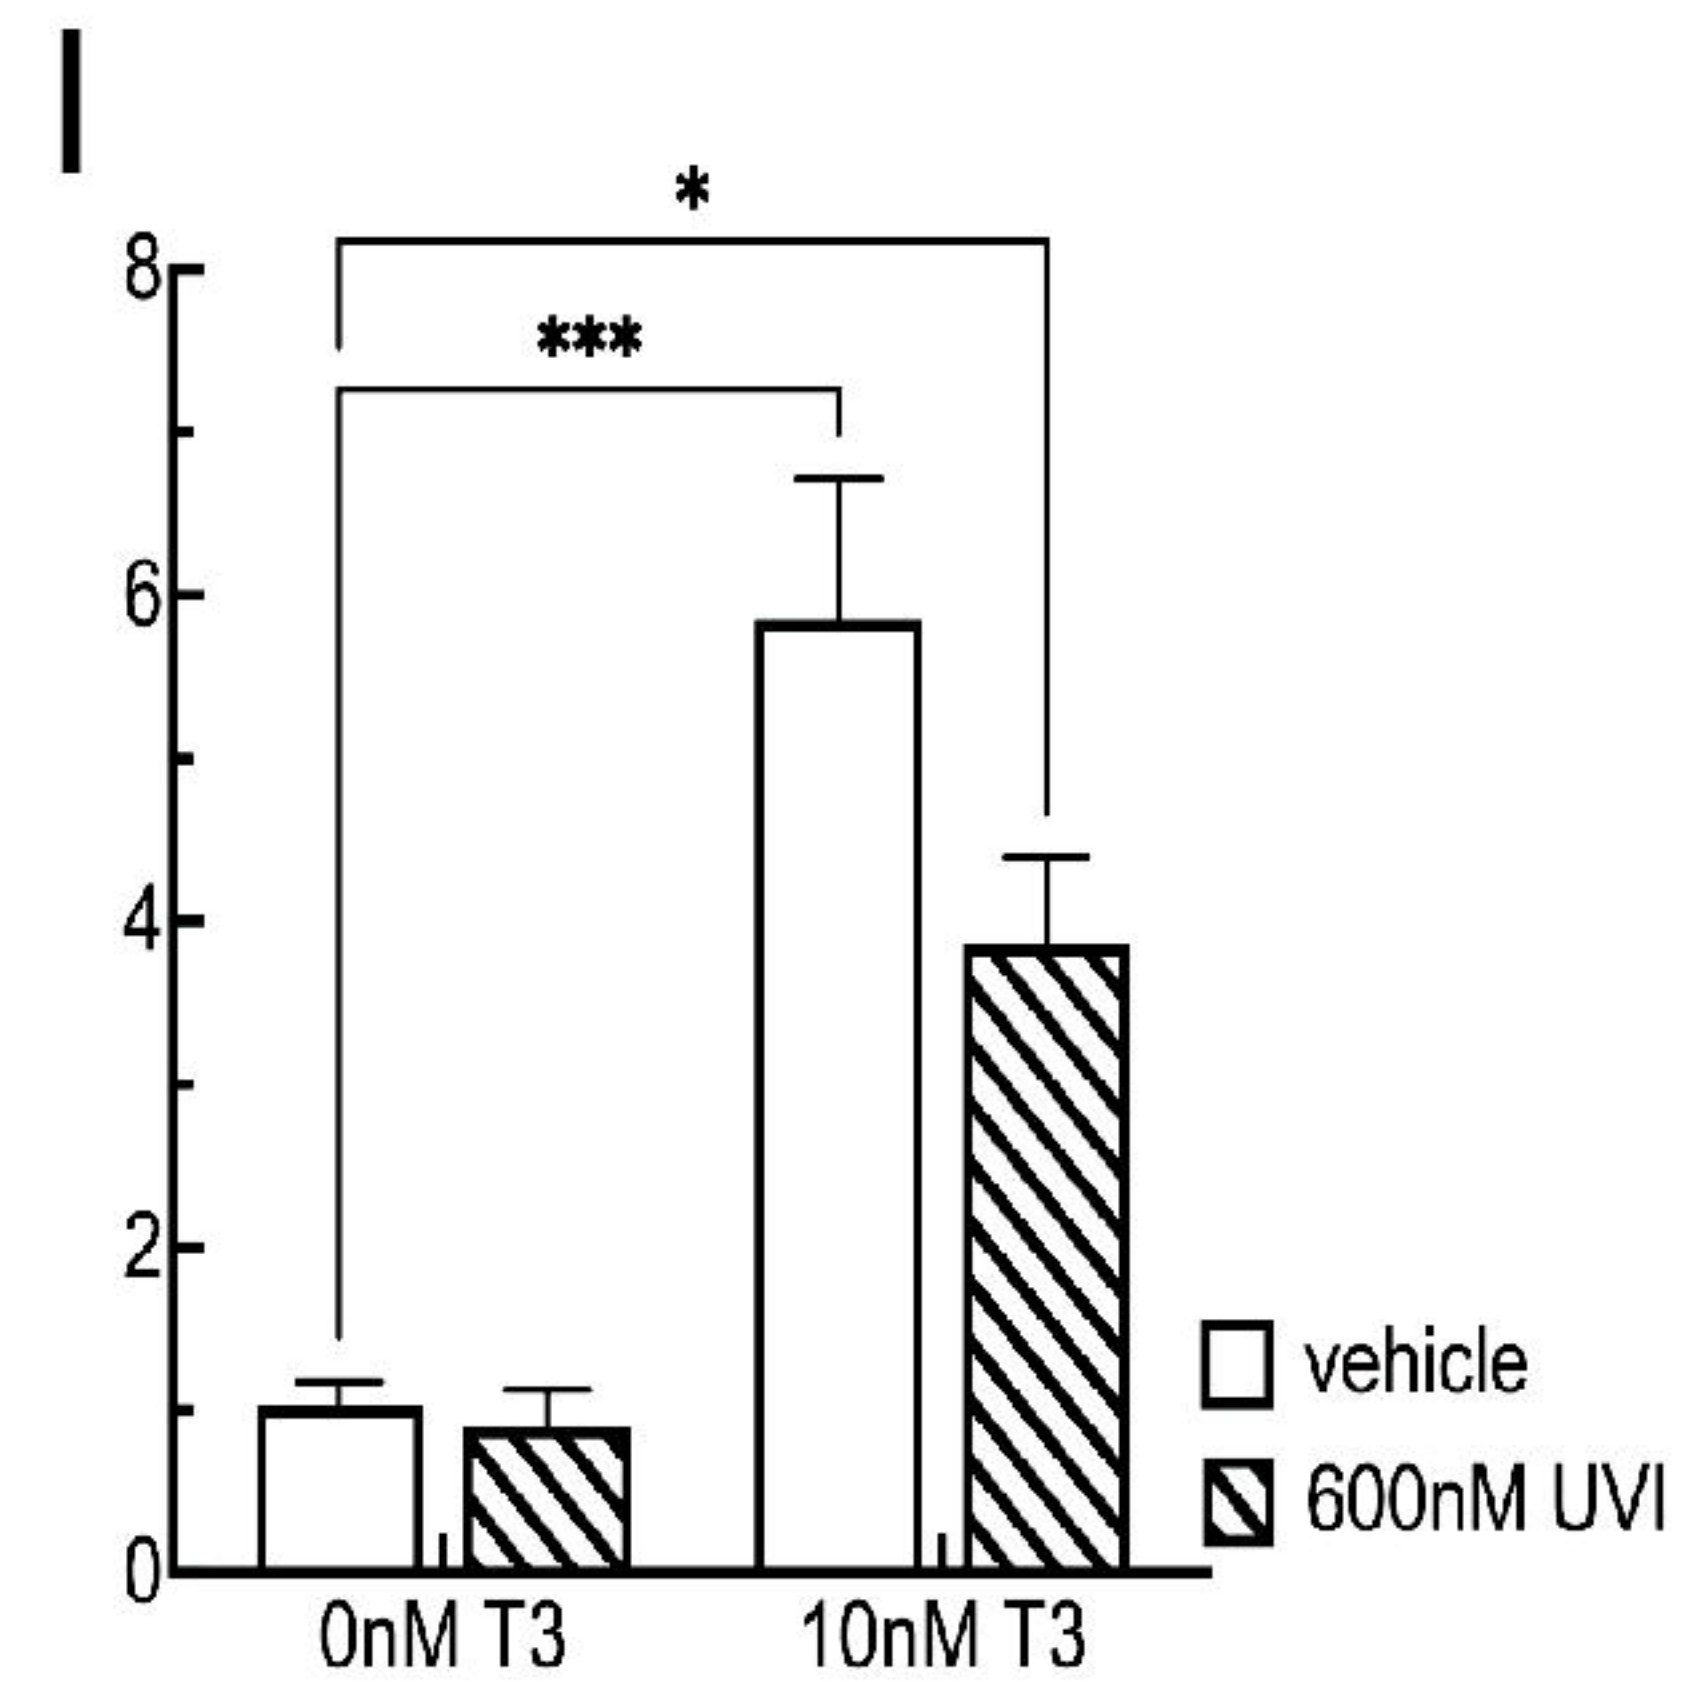



Figure 3

Bex

TBT

UVI

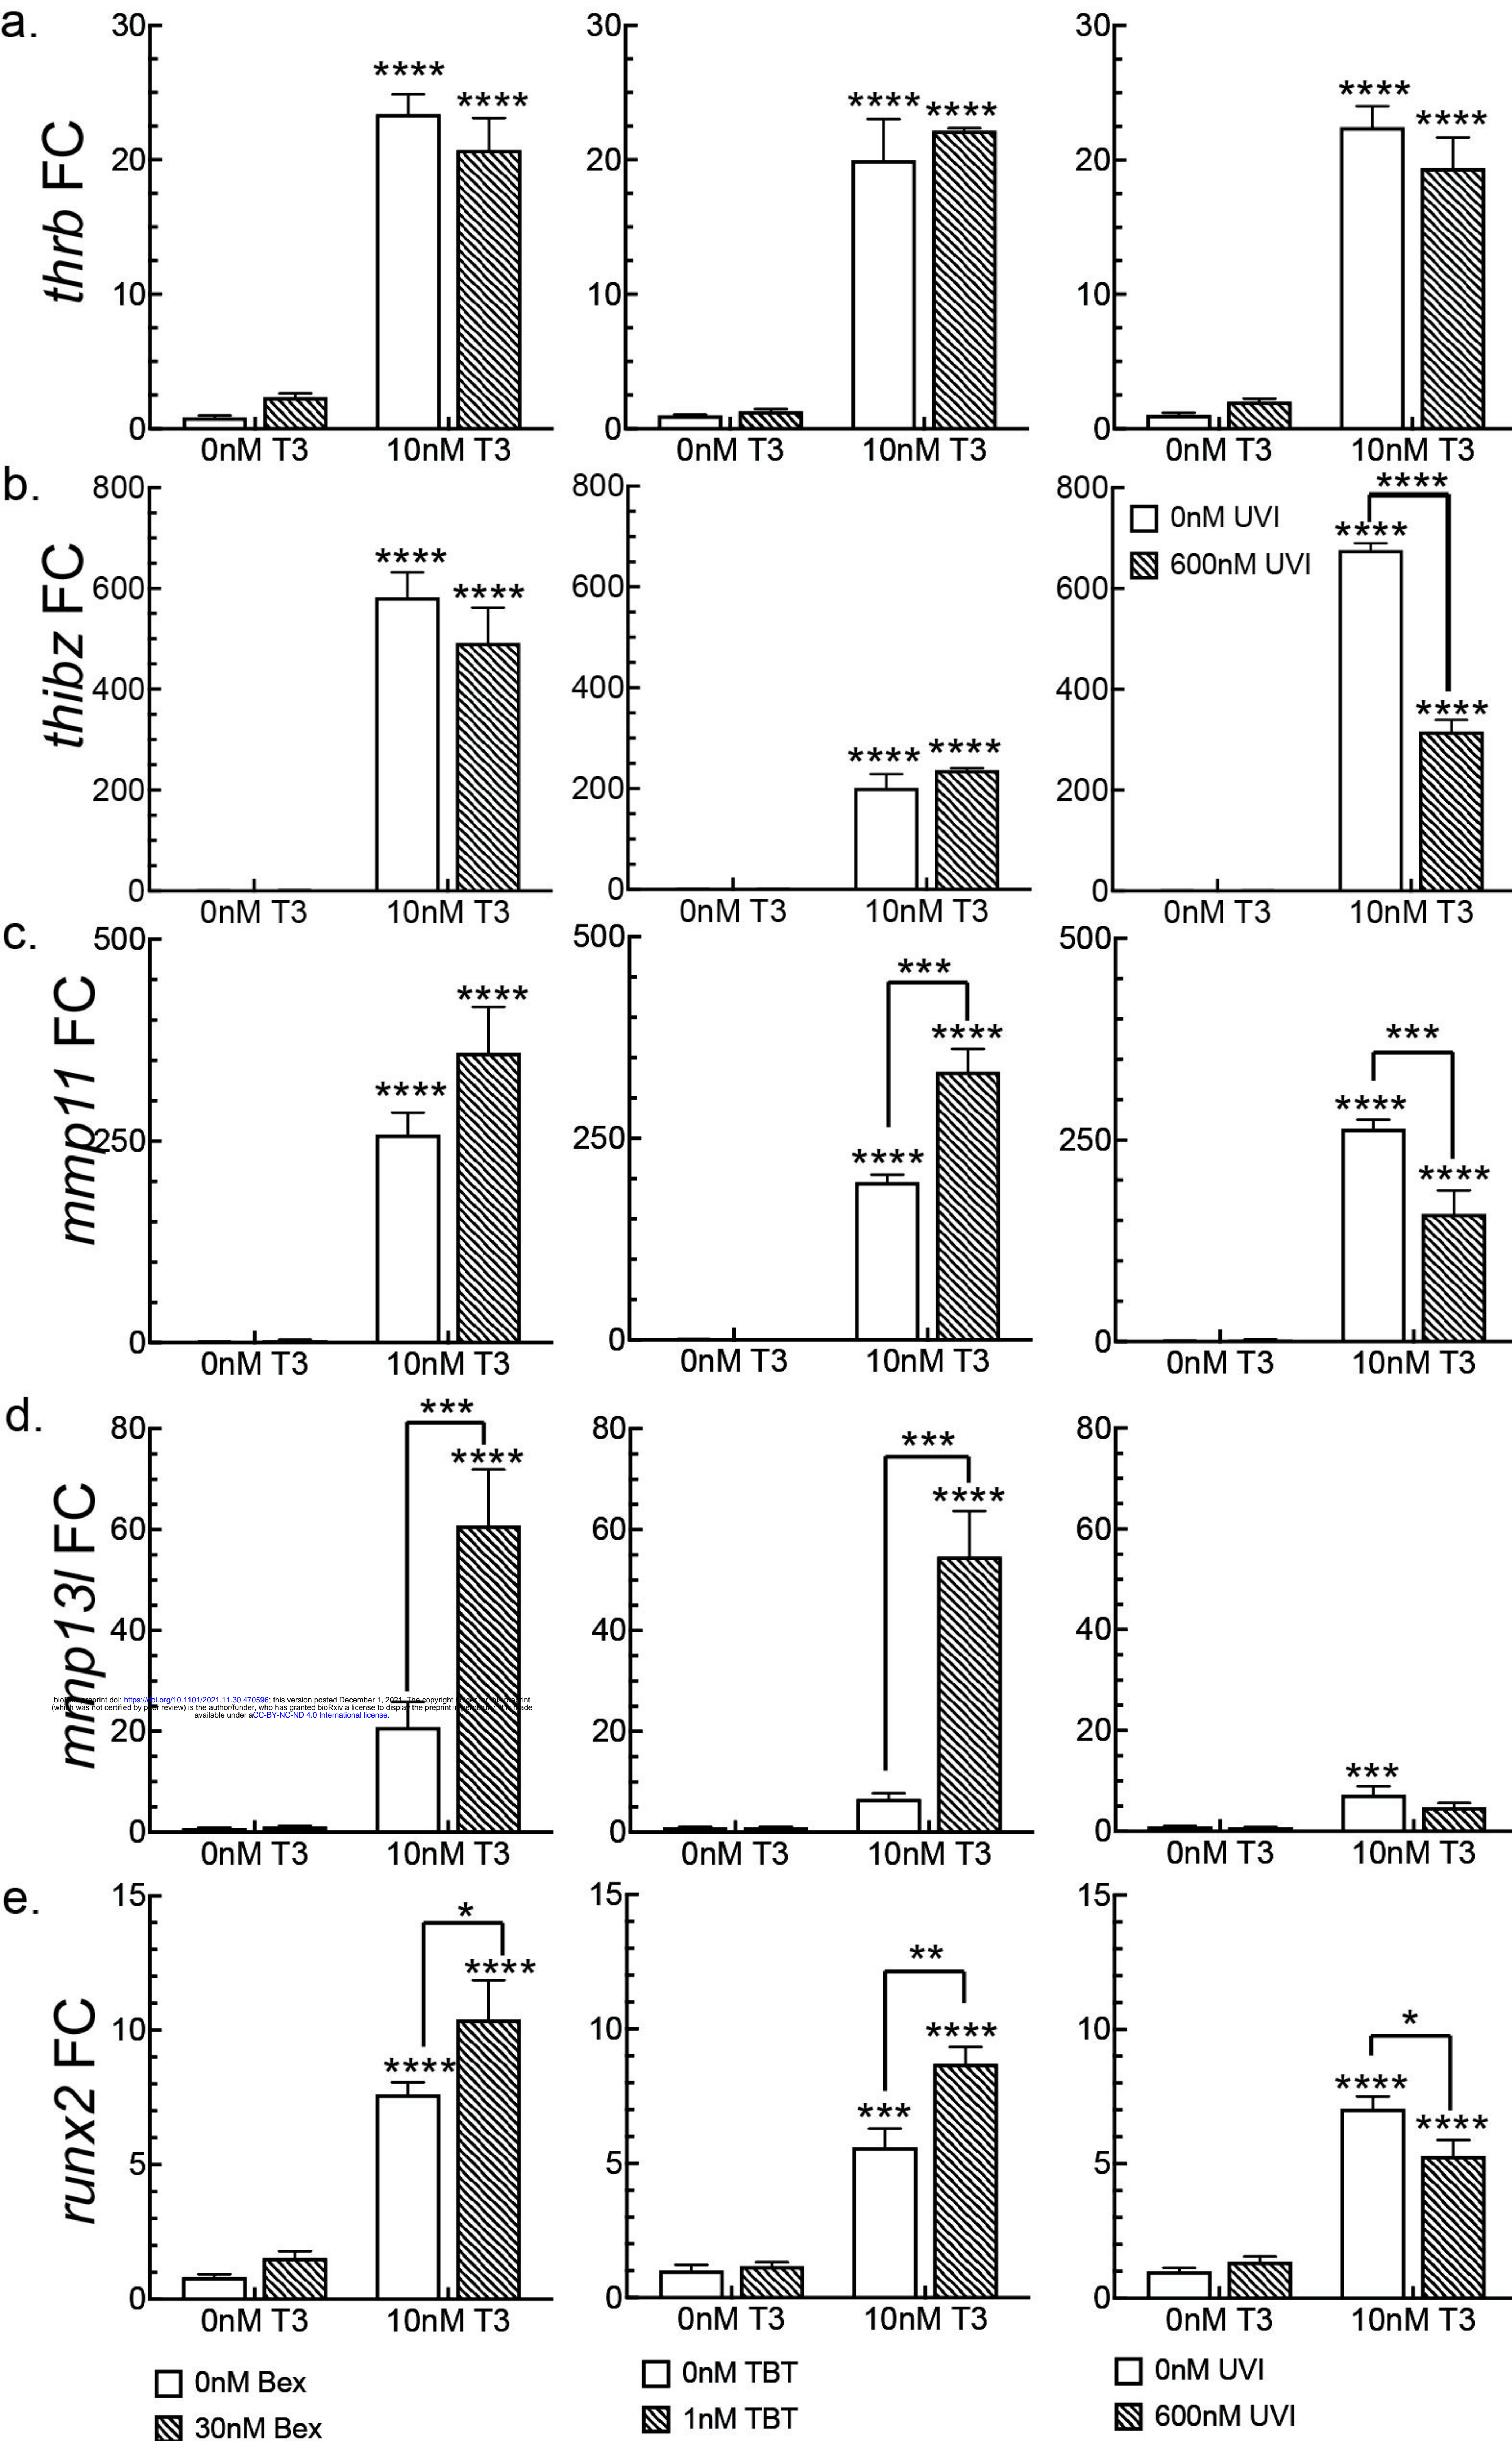



Figure 4

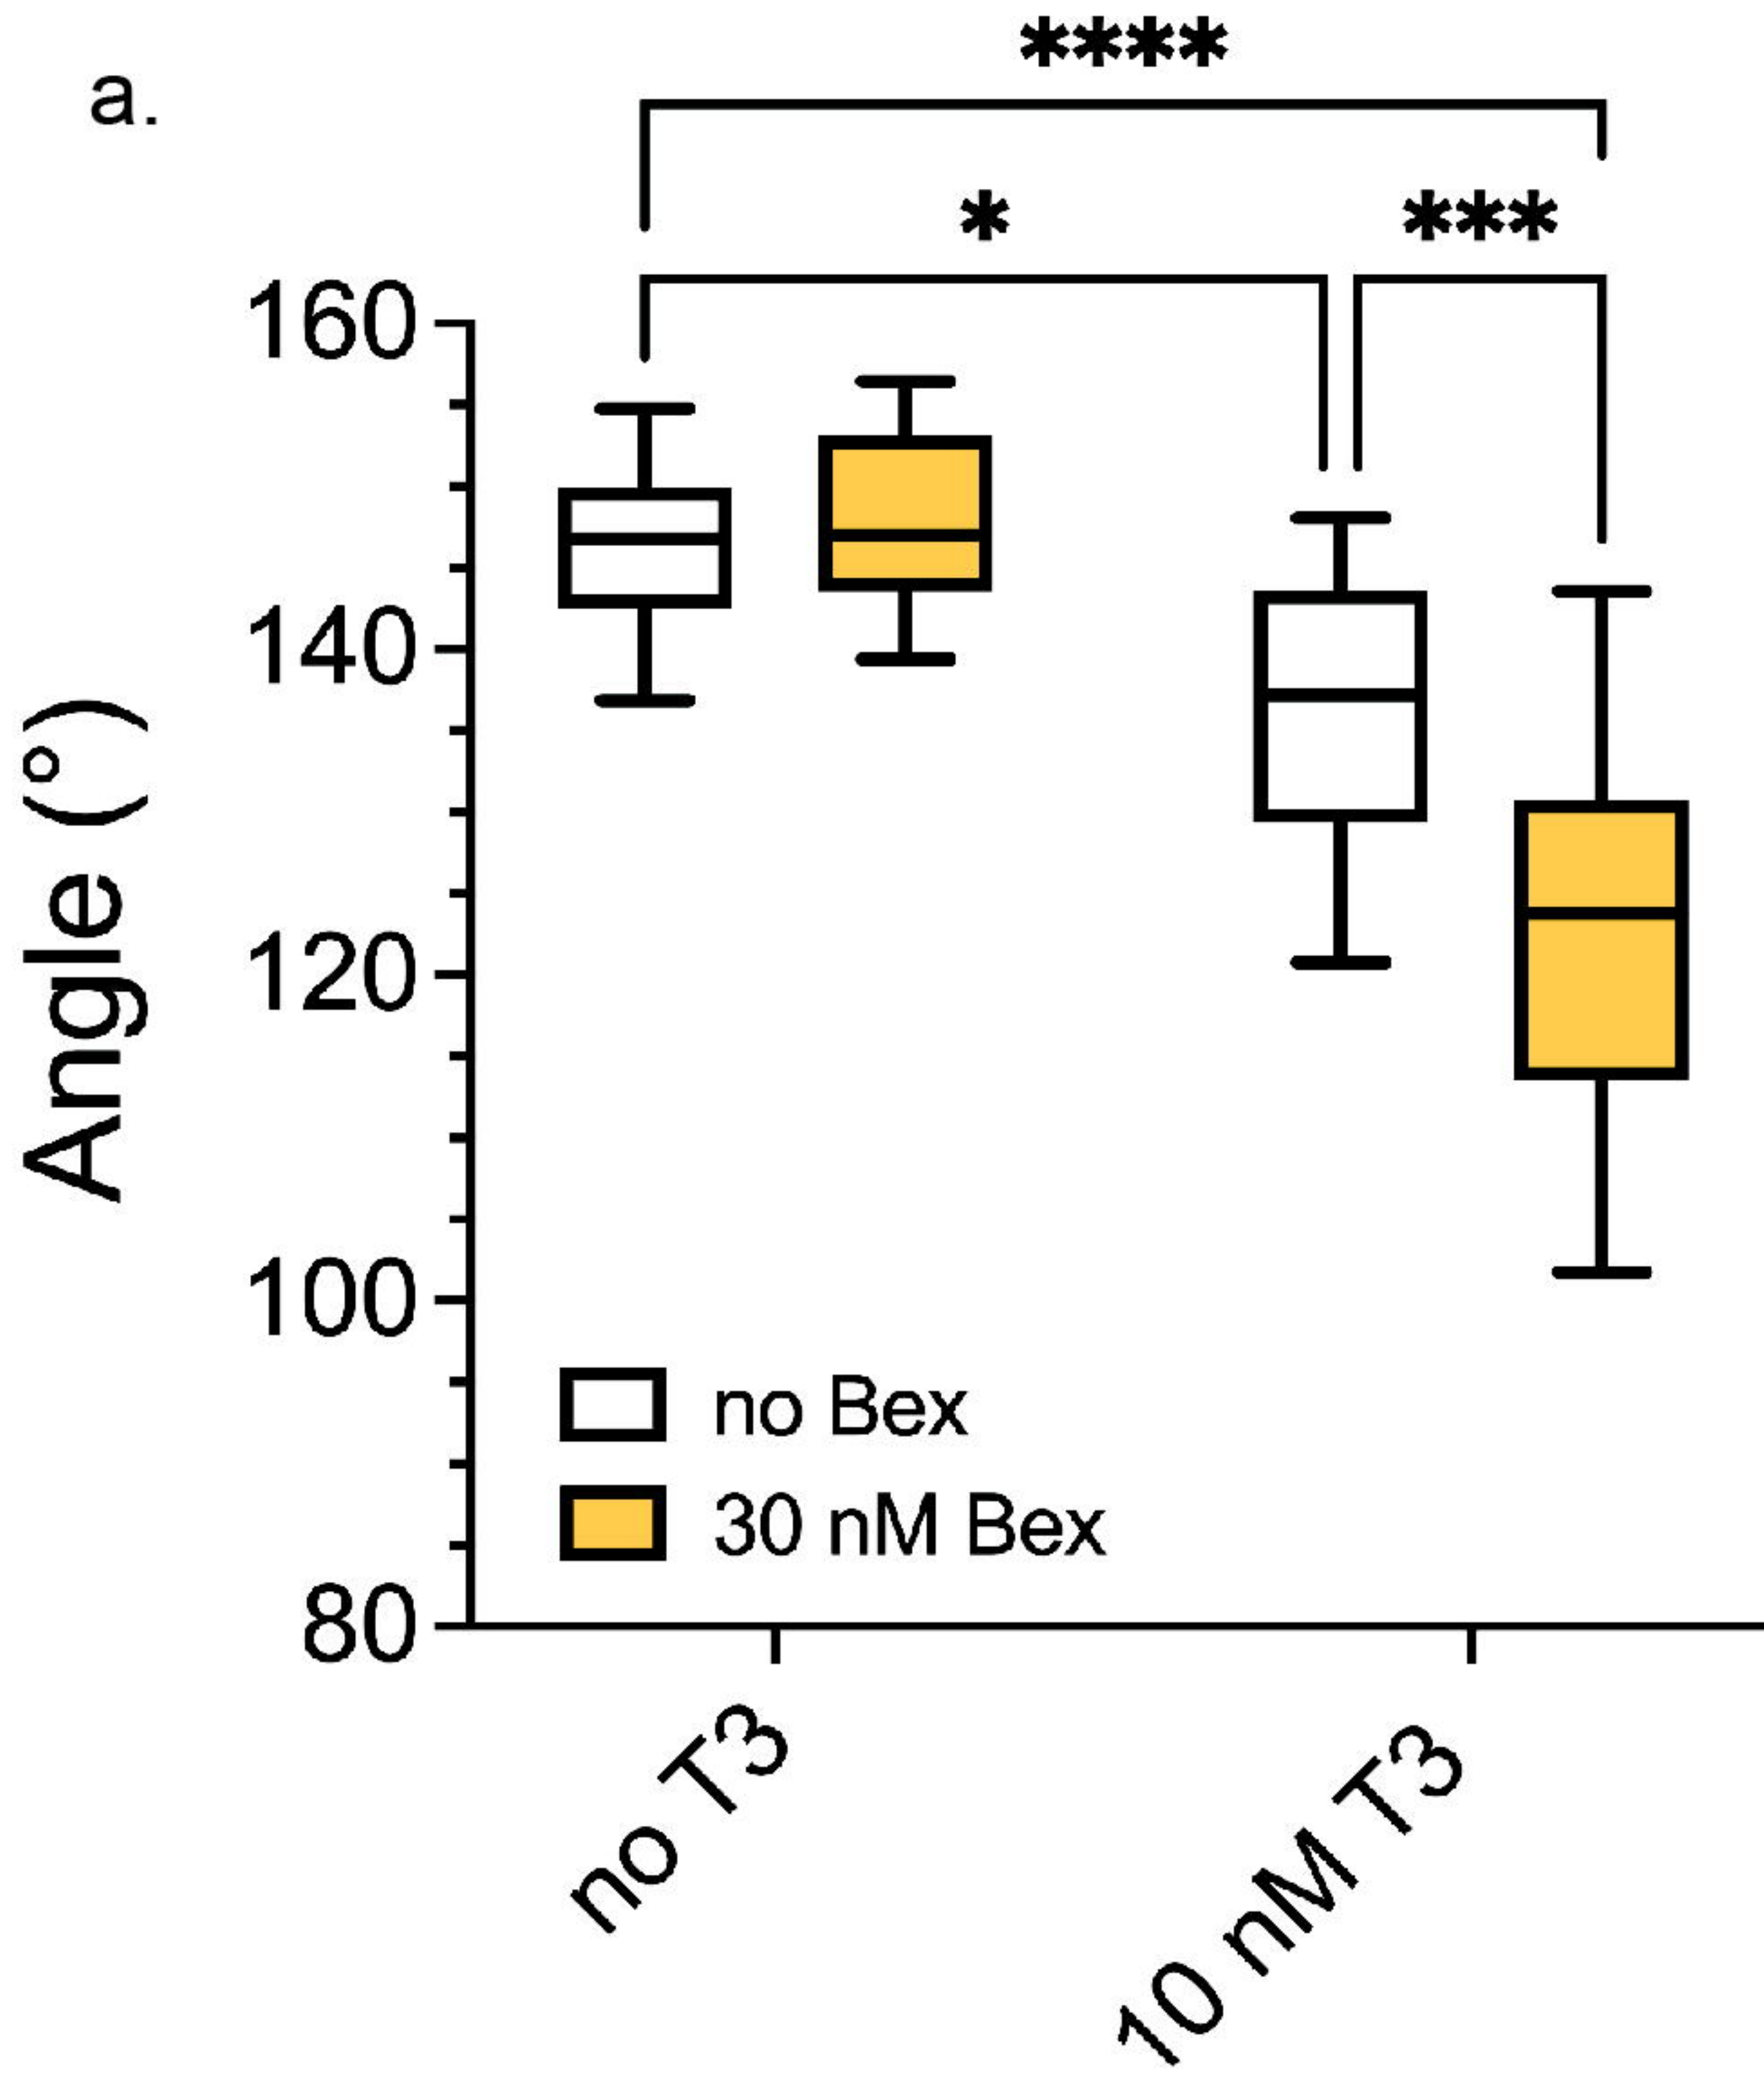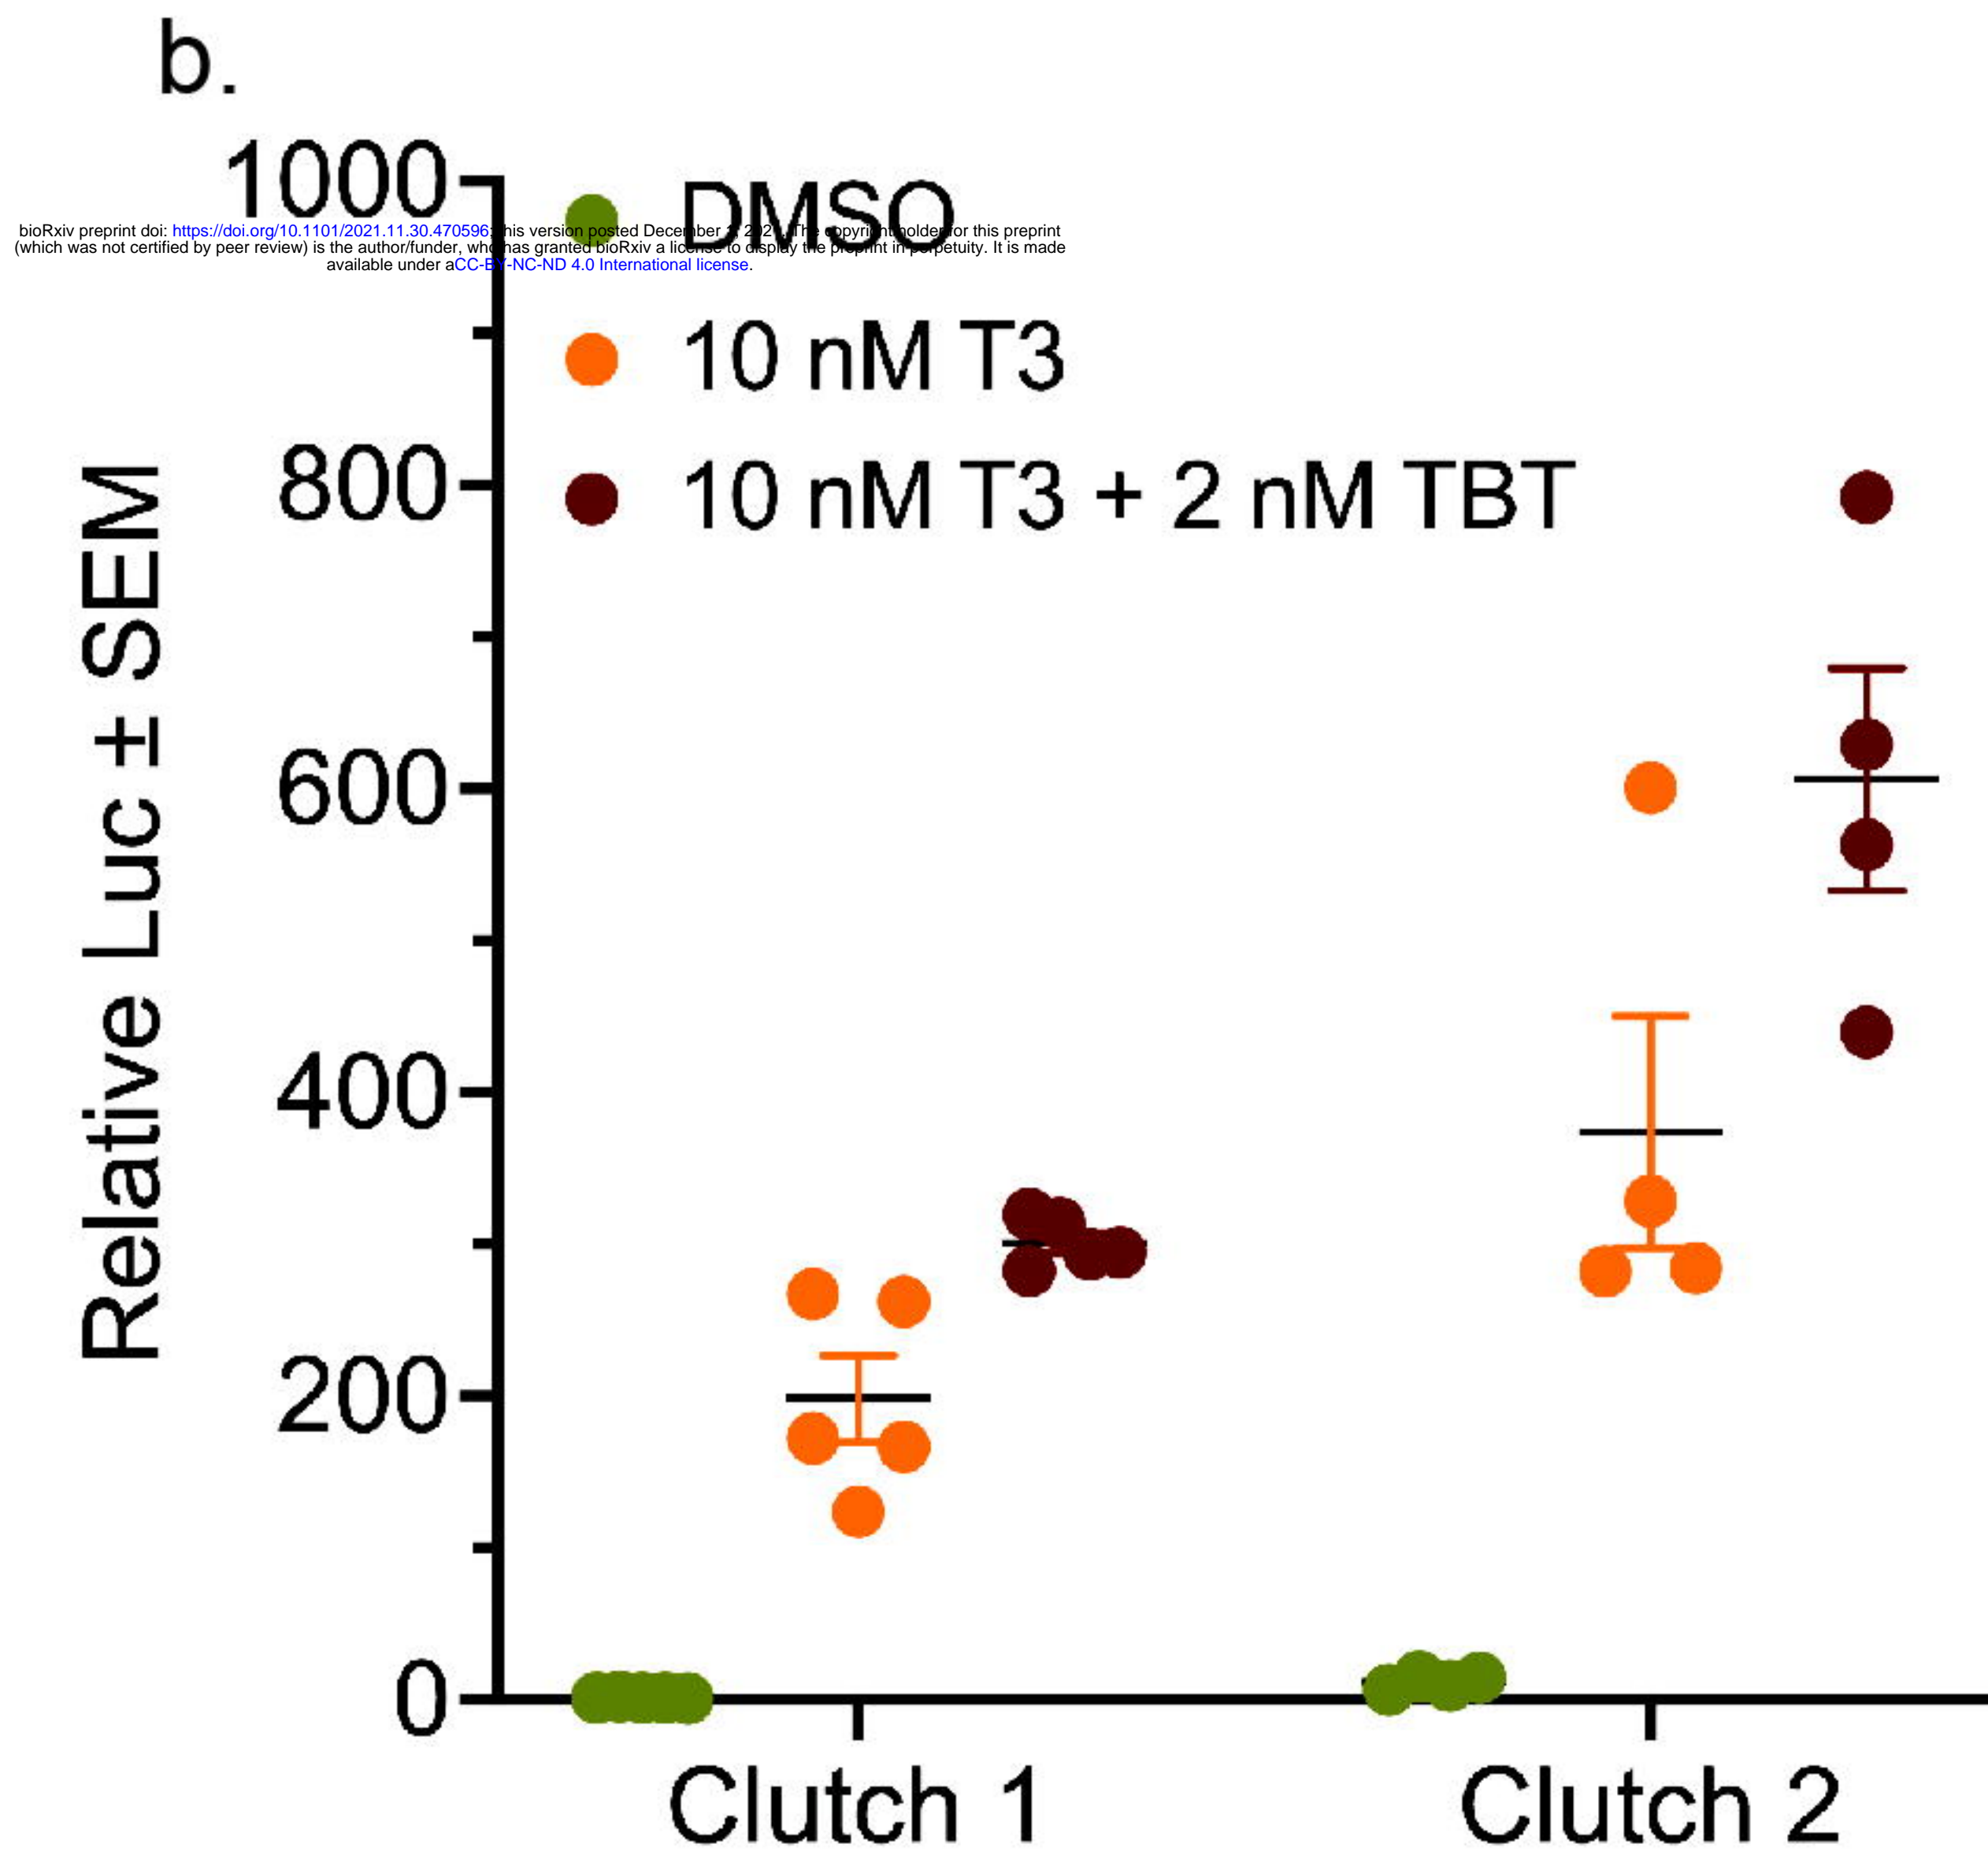

2-way ANOVA

Source of Variance

treatment:  $p < 0.0001$

clutch:  $p = 0.0005$

Tukey MCT

DMSO vs T3:  $p < 0.0001$

DMSO vs T3+TBT:  $p < 0.0001$

T3 vs T3+TBT:  $p = 0.0092$
